# Supplementary material for: SABRE populates ER domains essential for cell plate maturation and cell expansion influencing cell and tissue patterning
Source: eLife. 2021 Mar 9;10:e65166. doi: 10.7554/eLife.65166 (PMC7987345; doi:10.7554/eLife.65166)
Supplement: Figure 1—source data 1. [file elife-65166-fig1-data1.xlsx]

## Sheet: Figure 1 C source data
C	Growth Assay Normalized Area
wild type	∆sab/wt	GFP-tub	∆sab/GFP-tub
1.1411	0.15336	0.35925	0.14956
0.88079	0.15353	0.37918	0.16603
0.52216	0.1714	0.41071	0.17493
1.5018	0.18581	0.45029	0.19487
1.2121	0.1967	0.45914	0.20531
1.2566	0.19755	0.47308	0.20587
1.2385	0.20644	0.49368	0.20857
0.79705	0.21412	0.54185	0.21768
0.99333	0.21702	0.55569	0.22001
0.76694	0.24531	0.5763	0.22295
1.5344	0.25549	0.57776	0.23123
0.49101	0.25661	0.6354	0.24029
1.551	0.26557	0.64285	0.25097
0.72645	0.27652	0.64435	0.26681
1.1553	0.28136	0.66785	0.28621
0.66603	0.28379	0.68176	0.28661
1.4189	0.29399	0.68339	0.29888
0.87429	0.29773	0.75224	0.30811
0.57842	0.29926	0.76411	0.30818
0.69372	0.30027	0.81818	0.31005
	0.31176	0.90261	0.31265
	0.32209	0.90911	0.32812
	0.32579	0.9149	0.33242
	0.33054	0.91783	0.33514
	0.33524	0.92507	0.34114
	0.33812	0.95223	0.34594
	0.34912	0.98329	0.35322
	0.35973	1.1751	0.35965
	0.37529	1.2503	0.36298
	0.38066	1.2511	0.36445
	0.39046	1.3525	0.37535
	0.3923	1.4408	0.37601
	0.40675	1.4965	0.3938
	0.41233	1.5796	0.40571
	0.41557	1.7323	0.41637
	0.41577	2.3291	0.41678
	0.42323		0.43057
	0.43171		0.43289
	0.43918		0.44784
	0.44412		0.46786
	0.46169		0.46831
	0.50735		0.57027
	0.51953		0.62243
	0.53572
	0.54331
	0.58662
	0.60758
	0.73092
	0.88173
	0.93222
