# Supplementary material for: SABRE populates ER domains essential for cell plate maturation and cell expansion influencing cell and tissue patterning
Source: eLife. 2021 Mar 9;10:e65166. doi: 10.7554/eLife.65166 (PMC7987345; doi:10.7554/eLife.65166)
Supplement: Figure 1—source data 2. [file elife-65166-fig1-data2.xlsx]

## Sheet: Figure 1 E F G source data
E	Gametaphore Height (µm)			F	Phyllid span (µm)			G	Rhizoid length (µm)
wild type	∆sabre			wild type	∆sabre			wild type	∆sabre
1120.1	882.25			1282.2	1056.8			3157.5	1650.5
950.48	884.6			904.25	1129.2			3215.7	1155.5
1322.4	1145.2			1088.4	1251.4			3945.9	1326.4
967.78	802.39			1145.2	605.6			3311.2	626.33
1588.8	833.16			1040.2	722.1			2950.9	881.3
1448.2	1014.3			1369.5	901.62			3633.2	1170.5
1492.5	923.98			1857.7	1108			4844.1	1634.6
1247.9	677.04			1304.2	641.31			4818.9	882.42
2131.5	670.99			1348.7	580.57			3268.5	613.17
1555.2	1045.1			1169.7	1161.8				1190.2
	890.2				1164.7				903.61
	792.52				1163.4				823.35
	957.97				855.31				1277.5
	817.46				1072.7				1069.1
					1272.5				944.88
