# Supplementary material for: SABRE populates ER domains essential for cell plate maturation and cell expansion influencing cell and tissue patterning
Source: eLife. 2021 Mar 9;10:e65166. doi: 10.7554/eLife.65166 (PMC7987345; doi:10.7554/eLife.65166)
Supplement: Figure 2—figure supplement 1—source data 1. [file elife-65166-fig2-figsupp1-data1.xlsx]

## Sheet: Figure 2S1 C source data
microtubule control															microtubule ∆sabre
cell1	cell2	cell3	cell4	cell5	cell6	cell7	cell8	cell9	cell10	Average	SE	time(s)			cell1	cell2	cell3	cell4	cell5	cell6	cell7	cell8	cell9	cell10	cell11	cell12	Average	SE	time(s)
1	1	1	1	1	1	1	1	1	1	1	0	0			1	1	1	1	1	1	1	1	1	1	1	1	1	0	0
0.890935	0.910992	0.893876	0.913761	0.900417	0.858868	0.889671	0.869108	0.817677	0.910209	0.885551	0.00941427	3			0.896347	0.95026	0.913725	0.942797	0.948657	0.918114	0.91318	0.940237	0.902081	0.907077	0.872195	0.931163	0.919653	0.00685986	3
0.826073	0.860547	0.846441	0.866878	0.842356	0.804029	0.837378	0.830486	0.737342	0.862678	0.831421	0.0120618	6			0.851603	0.904286	0.857935	0.893253	0.912205	0.864315	0.875346	0.911803	0.854798	0.870852	0.838682	0.893121	0.87735	0.00722415	6
0.77604	0.81833	0.80818	0.828355	0.794199	0.761209	0.793002	0.797453	0.675254	0.82218	0.78742	0.0140814	9			0.81504	0.860424	0.808012	0.851088	0.880403	0.819388	0.845002	0.887122	0.817782	0.836462	0.811904	0.860405	0.841086	0.00787537	9
0.734906	0.785371	0.775651	0.79474	0.750198	0.725766	0.753008	0.766519	0.624013	0.784261	0.749443	0.0156529	12			0.780919	0.820641	0.763985	0.812582	0.851564	0.780595	0.818323	0.864115	0.792364	0.808893	0.791445	0.829931	0.809613	0.00858333	12
0.699389	0.753545	0.750012	0.765028	0.712154	0.694698	0.716033	0.7389	0.583692	0.749338	0.716279	0.0166183	15			0.749758	0.782508	0.72684	0.778284	0.824922	0.746508	0.79357	0.844259	0.773885	0.781733	0.769647	0.802867	0.781232	0.0094769	15
0.667067	0.72506	0.722642	0.738462	0.678481	0.666478	0.682359	0.717622	0.548903	0.715461	0.686254	0.0173502	18			0.723341	0.749275	0.691237	0.747384	0.799004	0.715643	0.772273	0.826817	0.75607	0.753452	0.748846	0.779125	0.755206	0.0105612	18
0.635357	0.697451	0.696372	0.714049	0.647673	0.642757	0.6518	0.695911	0.51649	0.68459	0.658245	0.0180213	21			0.699814	0.71793	0.658442	0.719348	0.773319	0.689345	0.751868	0.808099	0.73759	0.730172	0.729163	0.757598	0.731057	0.0114165	21
0.606842	0.673447	0.672511	0.690157	0.620618	0.622501	0.62392	0.675403	0.492891	0.654785	0.633308	0.0180728	24			0.677955	0.687391	0.628205	0.693853	0.748897	0.667497	0.729509	0.790903	0.718463	0.707781	0.711098	0.736756	0.708192	0.0121509	24
0.579799	0.654593	0.646931	0.668784	0.598076	0.604715	0.598985	0.658937	0.471715	0.626495	0.610903	0.0181943	27			0.658168	0.66109	0.601418	0.668884	0.724479	0.645538	0.709269	0.774343	0.701835	0.686606	0.693608	0.717932	0.686931	0.0127992	27
0.55452	0.637126	0.625873	0.648157	0.576245	0.586887	0.577007	0.641856	0.453501	0.60271	0.590388	0.0182567	30			0.637792	0.637249	0.576931	0.645402	0.698931	0.624094	0.692546	0.759665	0.687543	0.666199	0.677849	0.700422	0.667052	0.0135049	30
0.529485	0.620263	0.601917	0.626967	0.555736	0.568727	0.555854	0.626384	0.435777	0.578743	0.569985	0.0182904	33			0.620021	0.613696	0.555176	0.623519	0.673387	0.603989	0.676462	0.746216	0.674865	0.642442	0.663061	0.683474	0.648026	0.0141558	33
0.508662	0.603841	0.57812	0.606314	0.537102	0.554478	0.536813	0.611069	0.417965	0.555961	0.551032	0.0182931	36			0.604835	0.589933	0.535917	0.60467	0.648857	0.584687	0.661981	0.733869	0.66175	0.623956	0.648317	0.667707	0.63054	0.0147583	36
0.490733	0.588885	0.557316	0.586152	0.520791	0.540801	0.518435	0.601467	0.405053	0.537617	0.534725	0.0181958	39			0.587784	0.567699	0.518411	0.586752	0.624963	0.567034	0.647511	0.720875	0.645702	0.603433	0.634187	0.651267	0.612968	0.0151963	39
0.469821	0.573476	0.538107	0.568719	0.505364	0.527873	0.501374	0.590286	0.391969	0.518711	0.51857	0.0182621	42			0.571691	0.546232	0.502561	0.570107	0.601866	0.551493	0.632899	0.708844	0.630974	0.585388	0.621581	0.635834	0.596622	0.0156069	42
0.45116	0.558505	0.518468	0.552488	0.490944	0.512486	0.484492	0.579118	0.382197	0.501539	0.50314	0.0180812	45			0.557796	0.523964	0.487281	0.556151	0.578774	0.536332	0.618829	0.695085	0.618212	0.564385	0.610108	0.621297	0.580684	0.0159947	45
0.435355	0.545124	0.500527	0.539758	0.47794	0.50017	0.47003	0.567233	0.373128	0.486692	0.489596	0.0179172	48			0.543392	0.504191	0.472689	0.544179	0.554725	0.522162	0.606698	0.682697	0.609662	0.545942	0.599194	0.607575	0.566092	0.0165092	48
0.42347	0.530644	0.486363	0.526012	0.465303	0.48745	0.454794	0.558033	0.364048	0.473931	0.477005	0.0177345	51			0.529044	0.484898	0.459734	0.531925	0.531598	0.508307	0.595322	0.670087	0.600712	0.525865	0.587171	0.594284	0.551579	0.0170051	51
0.411642	0.51889	0.471057	0.51352	0.452744	0.478052	0.440133	0.550663	0.355021	0.461445	0.465317	0.0178033	54			0.514178	0.466567	0.446107	0.51987	0.509416	0.495693	0.583506	0.659162	0.591234	0.507239	0.576128	0.581712	0.537568	0.0176119	54
0.399502	0.506445	0.457823	0.499838	0.439145	0.468371	0.425772	0.54543	0.34828	0.451471	0.454208	0.0178271	57			0.49904	0.447669	0.433029	0.507543	0.487562	0.480929	0.572978	0.649162	0.579831	0.487503	0.565039	0.56845	0.523228	0.0183289	57
0.389942	0.494635	0.446256	0.488409	0.427447	0.459534	0.41148	0.537735	0.337968	0.443498	0.44369	0.0179705	60			0.48547	0.429645	0.420868	0.495157	0.464721	0.46851	0.563163	0.637464	0.567993	0.469565	0.553713	0.554991	0.509272	0.0188686	60
0.38094	0.482302	0.434026	0.47818	0.417035	0.450554	0.397693	0.530532	0.3352	0.434521	0.434098	0.0176574	63			0.470932	0.414283	0.406971	0.484112	0.442689	0.455856	0.553552	0.628034	0.5582	0.449949	0.541667	0.543046	0.495774	0.0196292	63
0.371078	0.471531	0.422829	0.465341	0.40841	0.445668	0.384409	0.524819	0.326023	0.427952	0.424806	0.0178958	66			0.455597	0.399519	0.393881	0.474953	0.421302	0.445996	0.543847	0.617503	0.549218	0.433179	0.529658	0.532286	0.483078	0.0202577	66
0.362272	0.461016	0.411658	0.453265	0.400234	0.441109	0.370645	0.520736	0.320291	0.420522	0.416175	0.018076	69			0.442582	0.387505	0.382624	0.466331	0.400582	0.437877	0.535264	0.609027	0.541931	0.416756	0.519478	0.52202	0.471831	0.0209195	69
0.357101	0.448605	0.401511	0.442797	0.393923	0.433961	0.35775	0.517291	0.317151	0.413367	0.408346	0.0179862	72			0.430309	0.376128	0.371985	0.458312	0.380347	0.429913	0.527391	0.602152	0.534159	0.398432	0.509817	0.512867	0.460984	0.0217108	72
0.350826	0.437228	0.391252	0.431594	0.387343	0.429079	0.347205	0.514369	0.31489	0.40522	0.400901	0.0179552	75			0.416873	0.365078	0.36247	0.451809	0.359662	0.421533	0.518641	0.593832	0.526313	0.38408	0.500022	0.504203	0.450376	0.0223526	75
0.344812	0.427346	0.381325	0.42042	0.381236	0.425969	0.337552	0.51331	0.312393	0.397875	0.394224	0.0181569	78			0.404315	0.352916	0.351394	0.444518	0.341992	0.414617	0.510796	0.58618	0.518495	0.368574	0.491149	0.495913	0.440072	0.0230882	78
0.338636	0.417409	0.370743	0.40946	0.375319	0.419833	0.328412	0.513538	0.311397	0.390945	0.387569	0.0183846	81			0.391586	0.341966	0.341672	0.438096	0.325008	0.407027	0.503693	0.579701	0.512032	0.356454	0.483318	0.487382	0.430661	0.0237974	81
0.331013	0.407976	0.36244	0.400503	0.370846	0.417158	0.31814	0.511396	0.305963	0.385217	0.381065	0.0188457	84			0.37909	0.331704	0.33356	0.431522	0.309923	0.399788	0.496721	0.57269	0.50592	0.34297	0.475956	0.480176	0.421668	0.0244384	84
0.32423	0.398911	0.356128	0.392409	0.364418	0.412805	0.309598	0.508126	0.299056	0.379682	0.374536	0.0191882	87			0.365806	0.321719	0.326735	0.42518	0.294743	0.394055	0.490421	0.565102	0.500175	0.330132	0.468718	0.473272	0.413005	0.0250493	87
0.316551	0.390275	0.351589	0.38471	0.358964	0.405498	0.300963	0.506282	0.292182	0.371843	0.367886	0.0195954	90			0.352537	0.312243	0.318555	0.418458	0.27915	0.388114	0.482946	0.558623	0.492689	0.317916	0.46241	0.467175	0.404235	0.0257077	90
0.308474	0.38281	0.344763	0.375457	0.353212	0.397549	0.293013	0.50218	0.288228	0.363702	0.360939	0.0197092	93			0.339272	0.303112	0.311951	0.410827	0.262675	0.381945	0.477214	0.552612	0.482746	0.30565	0.457258	0.461181	0.395537	0.0263877	93
0.29949	0.376831	0.33824	0.367215	0.346463	0.392765	0.285328	0.493645	0.284699	0.357572	0.354225	0.0195808	96			0.326905	0.293715	0.306273	0.40443	0.246626	0.373205	0.470678	0.547351	0.47411	0.294472	0.450017	0.454409	0.386849	0.0270253	96
0.290592	0.37084	0.331222	0.360134	0.341163	0.388054	0.276515	0.489567	0.278225	0.352923	0.347923	0.0199837	99			0.315864	0.28302	0.300295	0.398589	0.233931	0.365327	0.464479	0.544085	0.467513	0.283897	0.443574	0.447677	0.379021	0.027707	99
0.283663	0.364075	0.323994	0.353705	0.335521	0.382808	0.269106	0.485023	0.275417	0.347447	0.342076	0.0200807	102			0.305769	0.272739	0.294717	0.391786	0.221442	0.35694	0.458025	0.538928	0.461135	0.273953	0.437739	0.44046	0.371136	0.0282469	102
0.277632	0.358204	0.316639	0.348004	0.329571	0.377943	0.262109	0.480253	0.274674	0.343246	0.336828	0.0200817	105			0.29645	0.262331	0.289038	0.385408	0.209302	0.348732	0.450677	0.535398	0.455364	0.26447	0.431875	0.434157	0.3636	0.0288429	105
0.272507	0.354094	0.310934	0.342652	0.322733	0.371016	0.257544	0.476313	0.271588	0.340165	0.331955	0.0200774	108			0.287524	0.251842	0.28365	0.378543	0.198409	0.340906	0.444025	0.532102	0.448625	0.256611	0.425288	0.429674	0.356433	0.0293603	108
0.269622	0.348636	0.304119	0.338593	0.315786	0.367386	0.2535	0.473341	0.264871	0.337619	0.327347	0.0202662	111			0.278196	0.242148	0.278601	0.373959	0.18826	0.334693	0.438421	0.531065	0.442321	0.251255	0.418821	0.42412	0.350155	0.0298938	111
0.267727	0.341536	0.298224	0.334015	0.311184	0.36377	0.249935	0.467942	0.259413	0.334807	0.322855	0.0201287	114			0.269994	0.23363	0.274294	0.371055	0.17919	0.327816	0.43318	0.528451	0.435868	0.244007	0.415051	0.418263	0.344233	0.0303577	114
0.26715	0.33599	0.29298	0.33038	0.306672	0.357091	0.246644	0.466026	0.252171	0.332639	0.318774	0.0202458	117			0.262605	0.226956	0.269497	0.369645	0.171805	0.31986	0.427232	0.527605	0.428311	0.238841	0.411691	0.412333	0.338865	0.0307121	117
0.264619	0.329511	0.287109	0.326245	0.301519	0.352641	0.244337	0.463374	0.250646	0.331485	0.315149	0.020186	120			0.254778	0.220976	0.263846	0.368085	0.164444	0.311975	0.421156	0.526168	0.422989	0.23361	0.408157	0.406768	0.333579	0.0311013	120
0.261465	0.32556	0.282049	0.321848	0.296504	0.345704	0.241667	0.461703	0.252497	0.328868	0.311787	0.0200804	123			0.247811	0.216393	0.258576	0.36705	0.156808	0.306185	0.414399	0.525374	0.416948	0.228943	0.40519	0.402153	0.328819	0.0314556	123
0.258426	0.320287	0.27752	0.315712	0.293436	0.33918	0.240886	0.455701	0.254605	0.326741	0.308249	0.0195229	126			0.2408	0.211502	0.25459	0.364622	0.150019	0.301389	0.408326	0.524202	0.409605	0.224844	0.401749	0.397941	0.324132	0.0317054	126
0.254435	0.314329	0.273705	0.308981	0.291865	0.331021	0.241062	0.453562	0.251788	0.324156	0.30449	0.0193917	129			0.234512	0.207578	0.249363	0.36101	0.143995	0.297388	0.401597	0.524045	0.401393	0.221773	0.398962	0.393704	0.31961	0.0319017	129
0.25355	0.307211	0.269258	0.301832	0.288796	0.320703	0.242227	0.446606	0.248315	0.320103	0.29986	0.0187434	132			0.228819	0.204753	0.245466	0.357225	0.138032	0.292981	0.394908	0.523659	0.393452	0.219208	0.396767	0.389775	0.31542	0.032043	132
0.251129	0.301139	0.264528	0.295405	0.286565	0.313259	0.243797	0.439983	0.246802	0.317464	0.296007	0.0181827	135			0.223107	0.202007	0.241714	0.352596	0.131667	0.28759	0.38838	0.523527	0.387348	0.219432	0.393749	0.385667	0.311399	0.032173	135
0.250324	0.294633	0.25926	0.292063	0.2853	0.306911	0.24518	0.433863	0.240861	0.315039	0.292343	0.0178092	138			0.217029	0.199492	0.236861	0.351018	0.125616	0.282415	0.382806	0.523144	0.381765	0.220012	0.392366	0.380851	0.307781	0.0323768	138
0.250665	0.288338	0.256867	0.289617	0.282274	0.301288	0.24554	0.428416	0.238907	0.309306	0.289122	0.0173033	141			0.211594	0.196543	0.232605	0.349891	0.119623	0.276502	0.376407	0.523519	0.377057	0.219162	0.392064	0.37668	0.304304	0.032688	141
0.251011	0.280639	0.252839	0.286116	0.280191	0.297184	0.247796	0.423948	0.236439	0.305775	0.286194	0.0169469	144			0.205997	0.193645	0.228427	0.348743	0.114338	0.27131	0.370793	0.523903	0.372198	0.219544	0.390128	0.373163	0.301016	0.0329409	144
0.251751	0.273237	0.249709	0.284329	0.276264	0.291851	0.250771	0.421954	0.233361	0.300385	0.283361	0.0168052	147			0.199551	0.190508	0.224532	0.348878	0.109573	0.264948	0.365311	0.523802	0.368129	0.218053	0.389093	0.369385	0.297647	0.0332631	147
0.252899	0.267923	0.24796	0.281736	0.272739	0.285101	0.252981	0.417501	0.232141	0.295976	0.280696	0.0163863	150			0.193167	0.188227	0.220585	0.348243	0.10587	0.257576	0.361252	0.521884	0.364278	0.218251	0.38878	0.36555	0.294472	0.0334435	150
0.248739	0.262399	0.246762	0.278625	0.270175	0.276685	0.254394	0.416009	0.228043	0.291385	0.277322	0.0164698	153			0.18852	0.183827	0.217687	0.348402	0.102067	0.250433	0.356604	0.522602	0.363669	0.215685	0.387626	0.361392	0.291543	0.0338428	153
0.247529	0.258636	0.243268	0.276102	0.267175	0.272667	0.25404	0.413043	0.227255	0.288221	0.274794	0.0163457	156			0.183115	0.181028	0.214198	0.349855	0.098624	0.244127	0.352937	0.521438	0.361985	0.214106	0.386866	0.358781	0.288922	0.034148	156
0.244735	0.252033	0.238802	0.274158	0.264685	0.268182	0.253638	0.411596	0.232253	0.282629	0.272271	0.0162731	159			0.178324	0.179452	0.210939	0.352334	0.093819	0.237566	0.350468	0.520499	0.360108	0.21171	0.387248	0.356726	0.286599	0.0345607	159
0.242989	0.248081	0.236296	0.271326	0.262146	0.265787	0.253522	0.412248	0.237957	0.276613	0.270697	0.0163295	162			0.17448	0.179246	0.206365	0.355498	0.089798	0.230977	0.346784	0.521277	0.357839	0.207741	0.389177	0.354021	0.284434	0.0350439	162
0.24194	0.24323	0.234369	0.266424	0.26022	0.263215	0.251589	0.409789	0.246118	0.273408	0.26903	0.0161178	165			0.170234	0.178951	0.202524	0.356534	0.088249	0.22322	0.344478	0.521528	0.354621	0.20634	0.391661	0.351201	0.282462	0.0353622	165
0.238394	0.236107	0.231046	0.264507	0.256514	0.260735	0.251876	0.410216	0.254924	0.270483	0.26748	0.0163693	168			0.165956	0.176402	0.197703	0.35673	0.085267	0.215106	0.340335	0.522188	0.350544	0.203946	0.39338	0.347474	0.279586	0.0357806	168
0.231208	0.227481	0.227894	0.26491	0.253975	0.260463	0.252681	0.408267	0.262878	0.268315	0.265807	0.0165847	171			0.161281	0.172999	0.193395	0.356419	0.082219	0.209633	0.337513	0.524809	0.348734	0.202847	0.395105	0.340213	0.277097	0.0362694	171
0.224999	0.218186	0.224174	0.264065	0.251772	0.257339	0.251155	0.405092	0.27379	0.264733	0.263531	0.0168543	174			0.156	0.169255	0.188443	0.356344	0.078718	0.202614	0.333359	0.525707	0.346172	0.202909	0.396275	0.334875	0.274223	0.0367244	174
0.221026	0.207501	0.219806	0.261413	0.252759	0.256294	0.249413	0.39868	0.285289	0.262035	0.261422	0.0169727	177			0.150035	0.165657	0.183838	0.354347	0.079072	0.196638	0.329474	0.526307	0.344238	0.202771	0.398264	0.329841	0.271707	0.0370209	177
0.217021	0.19983	0.212459	0.258652	0.252654	0.256198	0.245886	0.391621	0.28987	0.255888	0.258008	0.017059	180			0.144933	0.162499	0.179439	0.3488	0.07493	0.194071	0.326144	0.528245	0.340745	0.202182	0.397781	0.324855	0.268719	0.0373548	180
0.211795	0.194062	0.204399	0.254946	0.25203	0.25119	0.242302	0.387116	0.294425	0.253303	0.254557	0.0174276	183			0.142375	0.160913	0.175865	0.342891	0.074852	0.193139	0.322439	0.529596	0.337846	0.202378	0.397763	0.318976	0.266586	0.0373609	183
0.207822	0.18865	0.197816	0.255491	0.248246	0.252042	0.240216	0.384339	0.293567	0.24834	0.251653	0.0177387	186			0.13986	0.158352	0.173165	0.338317	0.068802	0.193852	0.31966	0.5313	0.334457	0.201938	0.398773	0.313538	0.264334	0.0376737	186
0.203576	0.185737	0.18936	0.254202	0.246667	0.246986	0.23828	0.383526	0.29214	0.247665	0.248814	0.0181762	189			0.137431	0.155822	0.172831	0.332953	0.061315	0.196045	0.316753	0.533866	0.331644	0.203001	0.397971	0.308937	0.262381	0.0379724	189
0.200073	0.180545	0.18348	0.253372	0.245658	0.247439	0.233118	0.381784	0.289596	0.249463	0.246453	0.0185211	192			0.135509	0.155039	0.173092	0.327383	0.06032	0.195956	0.315313	0.532685	0.330055	0.201999	0.395983	0.304039	0.260614	0.037809	192
0.198407	0.173618	0.179315	0.249176	0.243563	0.24429	0.229659	0.374809	0.280339	0.247683	0.242086	0.0182141	195			0.133609	0.153997	0.172438	0.32312	0.05662	0.196263	0.314391	0.531128	0.330046	0.202848	0.395905	0.30097	0.259278	0.0378466	195
0.196	0.163912	0.173365	0.244182	0.242366	0.244686	0.226277	0.370361	0.274197	0.246301	0.238165	0.0184296	198			0.130645	0.152533	0.172314	0.320227	0.051127	0.194735	0.311131	0.529723	0.327889	0.203369	0.397075	0.298518	0.257441	0.0380252	198
0.194811	0.157936	0.168933	0.240832	0.241913	0.245836	0.22344	0.3639	0.272954	0.244365	0.235492	0.0183765	201			0.129173	0.152331	0.171111	0.316523	0.044466	0.190754	0.309416	0.527052	0.325597	0.204901	0.398686	0.299805	0.255818	0.0382139	201
0.193147	0.153685	0.166726	0.235499	0.241294	0.249294	0.221055	0.355931	0.277232	0.241729	0.233559	0.0182258	204			0.12785	0.151415	0.171065	0.313276	0.042154	0.18784	0.307026	0.525178	0.320177	0.204381	0.398554	0.299994	0.254076	0.038167	204
0.188731	0.148897	0.165984	0.228814	0.239515	0.249192	0.220102	0.351255	0.277598	0.239341	0.230943	0.0182525	207			0.12679	0.150216	0.170718	0.313853	0.041461	0.184814	0.304555	0.524852	0.319129	0.205431	0.399942	0.301474	0.253603	0.0382872	207
0.183302	0.143555	0.166233	0.221193	0.236962	0.249818	0.219813	0.348071	0.274794	0.236453	0.228019	0.018346	210			0.125553	0.149707	0.16697	0.315274	0.037981	0.180681	0.302203	0.524262	0.317342	0.205832	0.401363	0.303972	0.252595	0.0385957	210
0.183448	0.140987	0.165096	0.214904	0.231833	0.252744	0.218972	0.341741	0.274977	0.233887	0.225859	0.0181125	213			0.124321	0.149066	0.163722	0.313389	0.033836	0.179618	0.29926	0.522918	0.316144	0.205136	0.402409	0.307151	0.251414	0.0388172	213
0.187017	0.140244	0.167892	0.206047	0.227439	0.259537	0.216956	0.33636	0.271414	0.230894	0.22438	0.0176687	216			0.123775	0.147182	0.160018	0.309837	0.033424	0.17571	0.295933	0.520943	0.312145	0.204297	0.405915	0.311069	0.250021	0.0389362	216
0.188097	0.141085	0.170577	0.199861	0.22488	0.258587	0.209282	0.330211	0.273669	0.227104	0.222335	0.0172382	219			0.123054	0.144531	0.155318	0.307453	0.033315	0.1726	0.292857	0.518457	0.310766	0.205709	0.407519	0.31651	0.249007	0.0390446	219
0.187928	0.141353	0.17598	0.192988	0.223872	0.25897	0.205776	0.324553	0.279485	0.2288	0.22197	0.0170378	222			0.122955	0.142771	0.151391	0.307212	0.03112	0.172573	0.289411	0.515444	0.308013	0.205192	0.407919	0.323123	0.248094	0.0391353	222
0.190643	0.140879	0.181284	0.186655	0.22352	0.256372	0.201367	0.317657	0.285279	0.228528	0.221218	0.0167569	225			0.123898	0.140733	0.147544	0.307342	0.027608	0.175568	0.286472	0.512901	0.302468	0.204731	0.408079	0.329455	0.247233	0.0392239	225
0.194004	0.140368	0.186918	0.181824	0.226435	0.254096	0.197534	0.313034	0.293756	0.226912	0.221488	0.016799	228			0.125409	0.138027	0.142439	0.304974	0.024377	0.179269	0.283381	0.509953	0.297477	0.203311	0.408417	0.335369	0.246034	0.0393007	228
0.19945	0.142169	0.191888	0.178056	0.227844	0.253544	0.194297	0.307902	0.298761	0.227536	0.222145	0.0166058	231			0.126673	0.134838	0.138496	0.301475	0.026943	0.179785	0.279419	0.50716	0.290439	0.203752	0.408762	0.340851	0.244883	0.0391341	231
0.201375	0.147769	0.196651	0.174626	0.230064	0.254385	0.188978	0.302015	0.307467	0.227044	0.223037	0.0165826	234			0.126098	0.133145	0.135039	0.300095	0.023078	0.176096	0.274759	0.505168	0.283757	0.205561	0.408866	0.343671	0.242944	0.0393066	234
0.203018	0.154783	0.201177	0.170354	0.230177	0.25033	0.184249	0.294092	0.312008	0.226333	0.222652	0.0161889	237			0.125177	0.132427	0.132265	0.297642	0.021982	0.175027	0.270069	0.502939	0.277347	0.206691	0.408149	0.346947	0.241389	0.0392807	237
0.206894	0.160616	0.204261	0.166936	0.22641	0.246708	0.181124	0.288068	0.320616	0.225896	0.222753	0.0162424	240			0.124114	0.131619	0.132359	0.295511	0.019843	0.173002	0.266023	0.499468	0.269228	0.207706	0.406266	0.353295	0.23987	0.0392332	240
0.215167	0.164951	0.210869	0.163339	0.221834	0.247475	0.177392	0.281436	0.333302	0.228449	0.224421	0.0168024	243			0.123592	0.131196	0.133485	0.293562	0.020873	0.171656	0.260278	0.495676	0.260076	0.204166	0.403756	0.357435	0.237979	0.0389558	243
0.222159	0.169794	0.218947	0.160245	0.221201	0.244983	0.178603	0.281459	0.350179	0.231679	0.227925	0.0178477	246			0.120146	0.127414	0.13574	0.28889	0.017277	0.172935	0.255821	0.492553	0.255157	0.205613	0.400193	0.363262	0.23625	0.0389771	246
0.229675	0.175561	0.226288	0.160022	0.218748	0.236539	0.180835	0.283962	0.360872	0.234261	0.230676	0.0184131	249			0.117053	0.122969	0.139619	0.283553	0.021596	0.171733	0.250876	0.490436	0.251196	0.206933	0.397067	0.369884	0.235243	0.0387757	249
0.236252	0.181637	0.229092	0.163094	0.218586	0.227139	0.181971	0.284126	0.365669	0.234847	0.232241	0.018442	252			0.112942	0.122327	0.142484	0.275997	0.018171	0.166608	0.245959	0.484922	0.243514	0.205882	0.392409	0.375994	0.232267	0.0386901	252
0.241929	0.187489	0.234661	0.168656	0.22442	0.219692	0.18196	0.288777	0.373664	0.234037	0.235529	0.0188515	255			0.110076	0.125234	0.146291	0.267094	0.017902	0.158542	0.24205	0.481053	0.235724	0.204257	0.38714	0.384213	0.229965	0.038551	255
0.246887	0.194922	0.23663	0.174228	0.229992	0.215312	0.182012	0.295812	0.387545	0.229655	0.239299	0.0198538	258			0.105802	0.131538	0.152564	0.25427	0.021233	0.157278	0.237867	0.479729	0.230925	0.20626	0.381702	0.395022	0.229516	0.038318	258
0.250118	0.201674	0.238057	0.181653	0.235644	0.207938	0.180337	0.300332	0.402917	0.230935	0.24296	0.0210192	261			0.105389	0.133782	0.158805	0.238688	0.025445	0.150485	0.235043	0.476085	0.221866	0.208227	0.376404	0.404433	0.227888	0.0380417	261
0.257636	0.210414	0.242897	0.189322	0.241693	0.201245	0.17728	0.301733	0.415613	0.233782	0.247162	0.0219541	264			0.106345	0.140097	0.167193	0.224275	0.01829	0.144904	0.231788	0.476665	0.214282	0.208339	0.370129	0.409915	0.226019	0.038217	264
0.260617	0.215016	0.241652	0.193786	0.250573	0.189236	0.174522	0.307109	0.424611	0.234689	0.249181	0.0230781	267			0.107915	0.144636	0.17524	0.213386	0.014953	0.138492	0.229483	0.473297	0.204912	0.209735	0.362107	0.411528	0.223807	0.0379657	267
0.262635	0.218769	0.239036	0.195552	0.261501	0.17523	0.169427	0.311172	0.432454	0.234768	0.250054	0.0244263	270			0.111084	0.149842	0.17819	0.199305	0.025569	0.13615	0.227579	0.467487	0.194855	0.210882	0.35621	0.412409	0.222464	0.0370626	270
0.261812	0.223695	0.238686	0.20179	0.269107	0.166285	0.164126	0.316421	0.43621	0.22555	0.250368	0.0253232	273			0.113447	0.154335	0.177013	0.186789	0.015656	0.129291	0.226308	0.462513	0.184783	0.214415	0.345389	0.413598	0.218628	0.0371223	273
0.26034	0.223646	0.240435	0.20635	0.278947	0.159325	0.157505	0.315662	0.436664	0.220212	0.249909	0.0259177	276			0.117401	0.160981	0.17034	0.179465	0.021173	0.131787	0.227259	0.45975	0.184698	0.215879	0.338695	0.413256	0.21839	0.0364768	276
0.264898	0.224303	0.239966	0.205603	0.29065	0.159807	0.149773	0.315625	0.42684	0.214846	0.249231	0.0257327	279			0.115934	0.167295	0.16422	0.171643	0.023052	0.138107	0.226382	0.458028	0.186568	0.21679	0.332635	0.409556	0.217518	0.0359843	279
0.263374	0.215673	0.239867	0.201658	0.304678	0.161831	0.150454	0.316723	0.40824	0.214982	0.247748	0.0247515	282			0.111649	0.174068	0.16533	0.168585	0.01639	0.147571	0.2219	0.456977	0.189632	0.222225	0.326663	0.409882	0.217573	0.035954	282
0.254188	0.21048	0.241196	0.200917	0.314987	0.161832	0.150007	0.317864	0.388268	0.220033	0.245977	0.0236928	285			0.107472	0.183271	0.166883	0.166876	0.011149	0.151166	0.221924	0.455678	0.189624	0.229174	0.313183	0.408014	0.217035	0.0357277	285
0.240142	0.207769	0.243942	0.199451	0.314612	0.147555	0.148629	0.319218	0.368223	0.216063	0.24056	0.0232012	288			0.103185	0.189504	0.167626	0.164989	0.033364	0.153434	0.221688	0.46668	0.189007	0.231618	0.3026	0.408674	0.219364	0.0352453	288
0.227546	0.210344	0.253981	0.202423	0.31753	0.138468	0.150787	0.31914	0.359486	0.21476	0.239447	0.0231168	291			0.104683	0.188848	0.166961	0.160066	0.035628	0.15714	0.225995	0.476352	0.184277	0.238837	0.297721	0.404578	0.22009	0.0354742	291
0.216385	0.20483	0.254729	0.205627	0.309796	0.13529	0.137319	0.320322	0.365963	0.217507	0.236777	0.0241045	294			0.09835	0.173559	0.157097	0.145094	0.027407	0.153276	0.224588	0.482857	0.179287	0.235012	0.286263	0.396446	0.21327	0.0363115	294
0.203661	0.200706	0.259974	0.209815	0.302612	0.134462	0.135601	0.295233	0.3911	0.218251	0.235142	0.0250003	297			0.090753	0.158698	0.142087	0.130911	0.021241	0.141038	0.223258	0.488326	0.194013	0.246612	0.274191	0.390623	0.208479	0.0373415	297
0.166076	0.197524	0.254062	0.203433	0.288374	0.122254	0.142393	0.278388	0.442328	0.218202	0.231303	0.029186	300			0.083113	0.151022	0.131476	0.117732	0.032335	0.131372	0.226235	0.478152	0.199092	0.26136	0.256723	0.390873	0.204957	0.0370835	300
