# Supplementary material for: SABRE populates ER domains essential for cell plate maturation and cell expansion influencing cell and tissue patterning
Source: eLife. 2021 Mar 9;10:e65166. doi: 10.7554/eLife.65166 (PMC7987345; doi:10.7554/eLife.65166)
Supplement: Figure 2—figure supplement 1—source data 2. [file elife-65166-fig2-figsupp1-data2.xlsx]

## Sheet: Figure 2S1 D source data
actin control															actin ∆sabre
cell1	cell2	cell3	cell4	cell5	cell6	cell7	cell8	cell9	Average	SE	time(s)				cell1	cell2	cell3	cell4	cell5	cell6	cell7	cell8	cell9	Average	SE	time(s)
1	1	1	1	1	1	1	1	1	1	0	0				1	1	1	1	1	1	1	1	1	1	0	0
0.951055	0.933665	0.9581	0.95571	0.897146	0.812968	0.933219	0.943785	0.96588	0.927948	0.0158697	0.12				0.93889	0.911346	0.894239	0.9163	0.908545	0.882088	0.920714	0.862511	0.924619	0.906584	0.00780349	0.12
0.932916	0.900641	0.941447	0.940683	0.859795	0.788005	0.904804	0.922879	0.950293	0.904607	0.0172808	0.24				0.914418	0.867649	0.866306	0.880166	0.879429	0.811514	0.878947	0.816603	0.891587	0.867402	0.011144	0.24
0.920655	0.875333	0.928772	0.930492	0.83318	0.770901	0.886567	0.909202	0.938728	0.888203	0.0184228	0.36				0.896031	0.837121	0.845977	0.855115	0.859206	0.762591	0.851381	0.786801	0.867974	0.840244	0.0137005	0.36
0.910831	0.855073	0.916802	0.922618	0.808541	0.754121	0.871919	0.897407	0.928896	0.874023	0.0197667	0.48				0.879823	0.813083	0.827108	0.83463	0.842416	0.724482	0.828888	0.764002	0.849545	0.81822	0.0156243	0.48
0.902162	0.837091	0.906023	0.915547	0.786807	0.741418	0.860169	0.886886	0.920078	0.861798	0.020826	0.6				0.865581	0.792384	0.811059	0.817335	0.827153	0.692651	0.809352	0.743764	0.832665	0.799105	0.017221	0.6
0.894544	0.820158	0.895633	0.908149	0.769595	0.729062	0.848773	0.876796	0.911637	0.850483	0.0217134	0.72				0.854207	0.774159	0.795519	0.802216	0.812768	0.666222	0.794073	0.72641	0.817463	0.78256	0.0185251	0.72
0.88665	0.806723	0.885575	0.902337	0.752989	0.718467	0.838671	0.86815	0.903604	0.840352	0.0224927	0.84				0.842375	0.757178	0.78019	0.790275	0.799439	0.642648	0.780089	0.712184	0.804299	0.767631	0.0195693	0.84
0.877976	0.793237	0.876538	0.897121	0.737682	0.709838	0.829891	0.859587	0.89617	0.830893	0.0231338	0.96				0.832655	0.740611	0.765625	0.778323	0.787041	0.621362	0.765765	0.697687	0.792323	0.753488	0.0205997	0.96
0.869981	0.780373	0.86817	0.892665	0.725005	0.703214	0.82109	0.851314	0.889073	0.822321	0.0235809	1.08				0.822001	0.724587	0.753025	0.766473	0.777747	0.602027	0.753561	0.684046	0.780444	0.740435	0.0214872	1.08
0.86333	0.768399	0.859312	0.887951	0.711588	0.697599	0.813294	0.843237	0.881677	0.814043	0.0240103	1.2				0.813062	0.711049	0.742765	0.75552	0.766611	0.584301	0.742176	0.671976	0.768404	0.728429	0.0222389	1.2
0.856667	0.756247	0.850529	0.88323	0.698833	0.689955	0.805161	0.836384	0.874844	0.805761	0.0246091	1.32				0.805524	0.696549	0.731746	0.744595	0.756677	0.570325	0.731821	0.663957	0.758323	0.717724	0.0226868	1.32
0.850819	0.74403	0.842632	0.878662	0.687294	0.682635	0.797253	0.82906	0.868602	0.797887	0.025198	1.44				0.797515	0.683112	0.722444	0.736239	0.74714	0.557319	0.722192	0.657	0.748211	0.707908	0.0230622	1.44
0.844446	0.733475	0.835639	0.873793	0.674681	0.676506	0.78966	0.822987	0.862335	0.790391	0.0257559	1.56				0.790601	0.670474	0.713729	0.72744	0.738859	0.54383	0.712785	0.648481	0.737648	0.698205	0.0236076	1.56
0.838864	0.723568	0.828367	0.869136	0.662172	0.670807	0.784064	0.816773	0.856574	0.783369	0.0263183	1.68				0.784009	0.659385	0.70417	0.718906	0.73087	0.531686	0.703868	0.639176	0.728548	0.688958	0.0240937	1.68
0.833314	0.715021	0.820986	0.86484	0.650939	0.663589	0.777927	0.810617	0.850538	0.776419	0.0268619	1.8				0.777475	0.649122	0.695882	0.712434	0.722862	0.521397	0.696072	0.630309	0.720132	0.680632	0.0244624	1.8
0.8273	0.705916	0.813939	0.860709	0.64274	0.659627	0.77154	0.804822	0.845122	0.770191	0.027076	1.92				0.770764	0.638505	0.689101	0.705728	0.715227	0.51198	0.68809	0.622705	0.712496	0.672733	0.0247502	1.92
0.8228	0.696636	0.8069	0.855999	0.634558	0.653255	0.76692	0.798472	0.839508	0.763894	0.0274412	2.04				0.764702	0.629164	0.681268	0.699935	0.707154	0.501731	0.680495	0.614771	0.704955	0.664908	0.0251393	2.04
0.817081	0.688514	0.800156	0.851254	0.626491	0.647158	0.761552	0.791215	0.833687	0.757456	0.0276924	2.16				0.75934	0.619003	0.673437	0.694895	0.69959	0.49199	0.672987	0.607903	0.697502	0.657405	0.0255415	2.16
0.812091	0.681617	0.794358	0.846968	0.619719	0.642367	0.756163	0.785015	0.828511	0.751868	0.0278529	2.28				0.753507	0.6088	0.66691	0.688065	0.694259	0.484113	0.664861	0.600667	0.691326	0.650279	0.0258159	2.28
0.807459	0.675278	0.789474	0.842137	0.611976	0.636987	0.751622	0.779745	0.823653	0.746481	0.0281256	2.4				0.747005	0.599306	0.659047	0.682264	0.687241	0.476288	0.657617	0.594178	0.685457	0.643156	0.0260008	2.4
0.80187	0.66803	0.784482	0.837464	0.603847	0.632686	0.745357	0.774096	0.81918	0.740779	0.028381	2.52				0.741067	0.591698	0.651129	0.677806	0.680293	0.467279	0.650971	0.58885	0.677931	0.636336	0.0262497	2.52
0.797441	0.661849	0.780305	0.832431	0.597313	0.62827	0.740127	0.76848	0.814563	0.735642	0.0285331	2.64				0.737385	0.585585	0.644167	0.671496	0.674702	0.458393	0.644501	0.583993	0.671929	0.630239	0.0266037	2.64
0.792252	0.655345	0.776672	0.827165	0.590817	0.622844	0.735157	0.762804	0.810078	0.730348	0.0287316	2.76				0.732981	0.579349	0.637716	0.665587	0.668706	0.45052	0.638643	0.579052	0.666675	0.624359	0.0268579	2.76
0.787403	0.649799	0.772463	0.822042	0.585624	0.618731	0.730559	0.756968	0.805594	0.725465	0.0287432	2.88				0.728246	0.573298	0.631261	0.660203	0.662632	0.44199	0.632586	0.574667	0.661501	0.618487	0.0271471	2.88
0.78311	0.643336	0.768723	0.818132	0.578182	0.61472	0.725246	0.752675	0.801337	0.720607	0.0290516	3				0.72344	0.567187	0.624263	0.655018	0.65678	0.434853	0.625867	0.569678	0.656169	0.612584	0.0273215	3
0.779023	0.635599	0.764506	0.813961	0.569664	0.61222	0.720625	0.747554	0.797358	0.715612	0.0293931	3.12				0.71914	0.561442	0.617266	0.648761	0.64912	0.427031	0.620368	0.563984	0.650393	0.606389	0.0275308	3.12
0.77449	0.627164	0.760678	0.810302	0.561065	0.609338	0.716011	0.742593	0.79267	0.710479	0.0297897	3.24				0.715712	0.556255	0.610443	0.643579	0.642349	0.419505	0.61521	0.55725	0.644747	0.600561	0.0278242	3.24
0.771118	0.620223	0.757549	0.805991	0.553784	0.6071	0.710909	0.736844	0.788953	0.70583	0.0300603	3.36				0.711906	0.552181	0.604475	0.637599	0.635192	0.41235	0.609101	0.553605	0.639069	0.595053	0.0279473	3.36
0.767905	0.61559	0.754027	0.801103	0.546878	0.603708	0.705945	0.731564	0.78573	0.701383	0.0302672	3.48				0.708693	0.54765	0.597781	0.630646	0.629283	0.406919	0.60307	0.548568	0.634264	0.589653	0.0280133	3.48
0.764226	0.610967	0.750593	0.796693	0.54095	0.601877	0.700082	0.725917	0.782457	0.697085	0.0303408	3.6				0.705196	0.543682	0.592937	0.625375	0.622136	0.401597	0.597136	0.544606	0.629114	0.584642	0.0280344	3.6
0.759689	0.60653	0.74747	0.791965	0.534525	0.597993	0.694578	0.721465	0.779345	0.692618	0.0305262	3.72				0.702187	0.538562	0.588054	0.620275	0.615788	0.395552	0.591843	0.542206	0.624156	0.579847	0.0281745	3.72
0.754873	0.602547	0.744756	0.787804	0.527316	0.593559	0.690971	0.716598	0.775329	0.688195	0.0307651	3.84				0.69882	0.533996	0.583783	0.615362	0.610748	0.390403	0.585084	0.538822	0.619271	0.575143	0.0282457	3.84
0.751665	0.597923	0.742294	0.783756	0.520075	0.590914	0.687306	0.711989	0.771653	0.684175	0.0310355	3.96				0.69534	0.528893	0.579161	0.610521	0.606191	0.385848	0.58023	0.534719	0.615077	0.570664	0.0283149	3.96
0.748602	0.5938	0.739235	0.779829	0.514365	0.589616	0.683799	0.706424	0.767634	0.680367	0.0310928	4.08				0.69138	0.524848	0.576112	0.606735	0.602107	0.381981	0.575969	0.530327	0.610871	0.566703	0.0283144	4.08
0.744978	0.5895	0.735587	0.775734	0.507542	0.586917	0.681944	0.701084	0.763661	0.676327	0.0312693	4.2				0.687275	0.520134	0.572664	0.602579	0.597412	0.377348	0.572408	0.526064	0.605731	0.562402	0.02835	4.2
0.742192	0.58455	0.732043	0.771351	0.502806	0.584437	0.678824	0.696024	0.760397	0.672514	0.0313536	4.32				0.682679	0.515403	0.568438	0.597713	0.593099	0.372156	0.568172	0.522207	0.601659	0.557947	0.0284082	4.32
0.739449	0.579225	0.72963	0.767	0.498204	0.582334	0.676505	0.691544	0.757308	0.669022	0.0314792	4.44				0.679204	0.511944	0.563647	0.593136	0.587705	0.368374	0.56356	0.518705	0.597466	0.553749	0.028355	4.44
0.736718	0.574232	0.726286	0.762997	0.492214	0.580238	0.672157	0.686629	0.753898	0.665041	0.0316674	4.56				0.675681	0.508874	0.558195	0.589147	0.584257	0.364272	0.559424	0.513386	0.592331	0.549507	0.028376	4.56
0.734488	0.57016	0.723647	0.759243	0.487026	0.577642	0.668011	0.681962	0.750151	0.66137	0.0318153	4.68				0.672018	0.505049	0.554383	0.585937	0.580086	0.361251	0.556025	0.507636	0.588461	0.54565	0.0283556	4.68
0.732845	0.566367	0.720587	0.755765	0.482204	0.574714	0.662791	0.676878	0.746956	0.657679	0.0319735	4.8				0.66813	0.501993	0.551298	0.58245	0.576815	0.358511	0.552556	0.503105	0.584089	0.542105	0.0282617	4.8
0.730713	0.562308	0.716552	0.751083	0.478229	0.572643	0.65849	0.672068	0.744065	0.654017	0.0319728	4.92				0.66351	0.499761	0.548185	0.577559	0.573726	0.355894	0.548745	0.49822	0.578997	0.538289	0.0280625	4.92
0.728094	0.559424	0.712732	0.74666	0.474944	0.569984	0.653947	0.6676	0.740882	0.650474	0.0318876	5.04				0.659077	0.496944	0.545014	0.573602	0.569759	0.35349	0.545027	0.493417	0.575449	0.534642	0.0279017	5.04
0.726396	0.5575	0.708161	0.742025	0.471352	0.5657	0.650276	0.663119	0.738387	0.646991	0.0318783	5.16				0.654698	0.494651	0.543929	0.567765	0.565252	0.351044	0.541289	0.487044	0.572423	0.530899	0.027752	5.16
0.72449	0.555643	0.703171	0.73752	0.468943	0.560654	0.646325	0.659664	0.735193	0.643511	0.0317737	5.28				0.650826	0.491788	0.542165	0.562886	0.561165	0.347621	0.537516	0.481296	0.568952	0.527135	0.0277373	5.28
0.722217	0.553736	0.698263	0.732741	0.467457	0.556641	0.641692	0.654876	0.732407	0.640003	0.0315523	5.4				0.647447	0.488634	0.539527	0.557197	0.559079	0.343685	0.533378	0.474683	0.564997	0.523181	0.0278318	5.4
0.720581	0.55157	0.694336	0.728608	0.466354	0.552646	0.638321	0.65042	0.729294	0.636903	0.0313801	5.52				0.643737	0.485326	0.538118	0.552876	0.55612	0.339356	0.530215	0.468327	0.561497	0.519508	0.0279765	5.52
0.718565	0.550333	0.690128	0.724087	0.464895	0.547793	0.634621	0.645957	0.7267	0.633675	0.0312208	5.64				0.640595	0.481521	0.535406	0.54834	0.55177	0.335603	0.526836	0.463147	0.558145	0.515707	0.0280486	5.64
0.715761	0.547947	0.686368	0.719454	0.462068	0.544828	0.629745	0.641896	0.724548	0.630291	0.0311365	5.76				0.637475	0.479062	0.5329	0.544634	0.547423	0.331287	0.523685	0.458345	0.555847	0.512295	0.0281809	5.76
0.7142	0.546056	0.68239	0.715235	0.458839	0.542176	0.625189	0.637898	0.722828	0.627201	0.031133	5.88				0.63475	0.477076	0.530449	0.540439	0.543822	0.327467	0.520156	0.454996	0.55299	0.509127	0.0282409	5.88
0.71176	0.544109	0.678799	0.710421	0.45528	0.540094	0.6201	0.634223	0.720905	0.623966	0.0310852	6				0.631768	0.474848	0.528387	0.537137	0.540343	0.324003	0.517106	0.451936	0.550991	0.50628	0.0282918	6
0.710209	0.5432	0.675309	0.706085	0.452062	0.538396	0.616064	0.629207	0.71931	0.621094	0.0310287	6.12				0.629393	0.472489	0.525675	0.534631	0.53551	0.320528	0.513188	0.447983	0.549237	0.503182	0.0283926	6.12
0.708032	0.542137	0.672484	0.701619	0.447247	0.533653	0.613863	0.624945	0.71765	0.617959	0.0312001	6.24				0.626804	0.470239	0.523407	0.532196	0.531409	0.318476	0.509133	0.446327	0.546921	0.500546	0.0282966	6.24
0.705536	0.540283	0.669559	0.697141	0.442408	0.530016	0.610477	0.621144	0.715784	0.614705	0.0313423	6.36				0.622703	0.467163	0.520353	0.531234	0.527589	0.316046	0.505406	0.444624	0.545102	0.497802	0.0281885	6.36
0.702846	0.538145	0.666257	0.693131	0.438286	0.525809	0.606528	0.616803	0.71389	0.611299	0.0314619	6.48				0.618308	0.46587	0.516811	0.530396	0.52312	0.313725	0.501824	0.443919	0.542985	0.495218	0.0279859	6.48
0.698441	0.536193	0.663765	0.689081	0.435183	0.523092	0.602934	0.611835	0.711531	0.608006	0.0313701	6.6				0.615605	0.463643	0.512052	0.530119	0.519803	0.311043	0.499249	0.443219	0.541807	0.492949	0.0279783	6.6
0.695895	0.534439	0.661317	0.68563	0.43318	0.519775	0.600776	0.608235	0.708724	0.60533	0.0312883	6.72				0.612073	0.462927	0.510136	0.529995	0.515988	0.308273	0.49663	0.441417	0.540929	0.49093	0.0279708	6.72
0.692921	0.531931	0.658637	0.682509	0.430663	0.514949	0.597075	0.604387	0.70564	0.602079	0.0313074	6.84				0.609204	0.460723	0.506783	0.529282	0.511889	0.305835	0.494996	0.439849	0.538798	0.488595	0.0279362	6.84
0.690625	0.528953	0.655784	0.679712	0.428777	0.51243	0.593988	0.600937	0.702237	0.599271	0.0312243	6.96				0.605561	0.459029	0.503225	0.528835	0.508073	0.303647	0.492153	0.438624	0.538062	0.486357	0.0278601	6.96
0.688246	0.52592	0.653101	0.676618	0.426174	0.510257	0.591123	0.597498	0.699188	0.596458	0.0311905	7.08				0.601539	0.457428	0.500185	0.526442	0.505037	0.302895	0.49031	0.43744	0.537429	0.484301	0.0276103	7.08
0.684665	0.522184	0.651174	0.673254	0.423912	0.506574	0.588514	0.594735	0.696584	0.593511	0.0311923	7.2				0.597603	0.454516	0.496518	0.523657	0.501433	0.301701	0.487228	0.436571	0.536467	0.481744	0.0273882	7.2
0.681852	0.519232	0.648673	0.670322	0.422231	0.503771	0.586496	0.59172	0.694376	0.590964	0.0311408	7.32				0.593475	0.451526	0.492665	0.521147	0.497405	0.301058	0.484412	0.43525	0.535005	0.479105	0.0271069	7.32
0.678454	0.515903	0.646014	0.667546	0.421976	0.5024	0.583254	0.588774	0.69171	0.588448	0.0308989	7.44				0.588122	0.448594	0.489637	0.518255	0.4932	0.299155	0.481172	0.432917	0.532975	0.476003	0.0268724	7.44
0.677867	0.513335	0.64371	0.66485	0.421703	0.500221	0.579932	0.586426	0.689377	0.58638	0.0308089	7.56				0.58398	0.445851	0.486155	0.51707	0.489653	0.296692	0.478536	0.42998	0.530931	0.473205	0.0268141	7.56
0.675475	0.511898	0.641946	0.662019	0.420414	0.499111	0.577232	0.584341	0.686899	0.584371	0.0306437	7.68				0.580413	0.443433	0.481916	0.515855	0.485648	0.295809	0.4761	0.427038	0.527753	0.470441	0.0266003	7.68
0.672241	0.511412	0.639776	0.658956	0.419045	0.498394	0.575383	0.581612	0.68475	0.582397	0.030398	7.8				0.57612	0.441661	0.477757	0.513811	0.482371	0.294997	0.472793	0.425836	0.526044	0.467932	0.0263217	7.8
0.670184	0.508331	0.637354	0.655606	0.417358	0.496733	0.573522	0.578893	0.681894	0.579986	0.0302964	7.92				0.572289	0.439942	0.475736	0.51201	0.478063	0.293718	0.469761	0.424333	0.523411	0.465474	0.026103	7.92
0.668975	0.506384	0.635321	0.652241	0.416398	0.49463	0.57126	0.576329	0.678609	0.577794	0.0301474	8.04				0.567368	0.437789	0.474411	0.510444	0.474852	0.292887	0.467089	0.423439	0.520932	0.463246	0.0257999	8.04
0.667132	0.505822	0.63325	0.649338	0.414672	0.493058	0.569603	0.573232	0.675393	0.575722	0.0299812	8.16				0.564041	0.436244	0.472227	0.508036	0.470962	0.292137	0.465012	0.422832	0.517574	0.461007	0.0255104	8.16
0.666153	0.504342	0.631713	0.646972	0.414174	0.492609	0.569013	0.570122	0.672942	0.574227	0.0298138	8.28				0.561443	0.434161	0.470994	0.503985	0.469542	0.292857	0.463638	0.421391	0.514452	0.459163	0.0251397	8.28
0.664722	0.502866	0.630274	0.643772	0.413323	0.49055	0.567149	0.566897	0.670412	0.572218	0.0296907	8.4				0.55812	0.431038	0.470397	0.499345	0.466139	0.292716	0.461625	0.418779	0.510579	0.456526	0.0248035	8.4
0.663007	0.500372	0.629136	0.641101	0.41346	0.48805	0.565536	0.56428	0.667868	0.570312	0.0295572	8.52				0.554146	0.428583	0.471429	0.497987	0.463046	0.292475	0.461182	0.417751	0.507479	0.454898	0.0245245	8.52
0.661003	0.499592	0.627262	0.63895	0.412875	0.486004	0.563546	0.561924	0.665119	0.568475	0.0293799	8.64				0.55026	0.426674	0.471442	0.495099	0.460665	0.291499	0.460349	0.414434	0.504479	0.452767	0.0243234	8.64
0.659397	0.498228	0.625699	0.636569	0.411397	0.483227	0.562741	0.559721	0.662172	0.566572	0.0293233	8.76				0.545922	0.425693	0.471384	0.492525	0.458118	0.290631	0.458957	0.411967	0.502392	0.450843	0.024091	8.76
0.657902	0.497731	0.624001	0.634789	0.41081	0.481715	0.560069	0.55737	0.659081	0.56483	0.0291433	8.88				0.542074	0.423335	0.470969	0.492775	0.454689	0.289755	0.458672	0.410653	0.500973	0.449322	0.0239722	8.88
0.656326	0.497985	0.621283	0.632959	0.409699	0.479586	0.556507	0.555122	0.655595	0.562785	0.0289551	9				0.539489	0.421099	0.469921	0.491689	0.451969	0.28824	0.458166	0.410331	0.4994	0.447812	0.0239171	9
0.653971	0.496395	0.618046	0.630737	0.408291	0.477168	0.554605	0.552305	0.652308	0.560425	0.0288033	9.12				0.536339	0.4172	0.470072	0.490915	0.448467	0.286515	0.456131	0.410812	0.497421	0.445986	0.0238671	9.12
0.652752	0.494261	0.614828	0.628186	0.406855	0.477415	0.552031	0.550012	0.64909	0.558381	0.028609	9.24				0.533442	0.413862	0.469961	0.491269	0.446365	0.285493	0.454767	0.40968	0.495319	0.444462	0.0238258	9.24
0.652079	0.49096	0.61205	0.624899	0.40612	0.475998	0.550286	0.547812	0.646147	0.556261	0.0284898	9.36				0.531121	0.41186	0.468742	0.489959	0.445111	0.285373	0.453729	0.407546	0.49297	0.442935	0.0236651	9.36
0.651273	0.4903	0.609929	0.622424	0.404348	0.476015	0.547837	0.546276	0.642977	0.554598	0.0283378	9.48				0.528902	0.409131	0.467965	0.488762	0.441948	0.284762	0.451709	0.406523	0.490511	0.441135	0.0235456	9.48
0.649918	0.489076	0.606966	0.619593	0.404066	0.477093	0.545906	0.544318	0.639991	0.552992	0.0280036	9.6				0.525631	0.407107	0.467721	0.488498	0.440944	0.282984	0.44914	0.404759	0.48942	0.439578	0.0235573	9.6
0.648736	0.486684	0.603963	0.617186	0.402879	0.475379	0.54407	0.541567	0.637017	0.550831	0.0279057	9.72				0.523684	0.405345	0.466995	0.487628	0.439932	0.28253	0.448079	0.404097	0.486908	0.438355	0.0234308	9.72
0.647025	0.483933	0.601074	0.614794	0.400931	0.476302	0.542703	0.539072	0.634344	0.548909	0.0277675	9.84				0.520866	0.404054	0.466173	0.488001	0.43848	0.281557	0.447045	0.400128	0.484996	0.436811	0.0234223	9.84
0.646888	0.481131	0.597854	0.612584	0.398392	0.476091	0.540281	0.536927	0.632134	0.54692	0.0278165	9.96				0.519161	0.402217	0.46643	0.488956	0.436945	0.281244	0.446373	0.398807	0.482021	0.435795	0.0233768	9.96
0.646651	0.479413	0.595202	0.610986	0.396796	0.474681	0.536501	0.534227	0.630241	0.544966	0.0278569	10.08				0.51551	0.399582	0.466004	0.488453	0.43623	0.280929	0.445819	0.396986	0.478914	0.43427	0.023208	10.08
0.646248	0.47815	0.592014	0.608121	0.394229	0.474273	0.532558	0.530771	0.627744	0.542679	0.0278399	10.2				0.512771	0.396852	0.466223	0.488285	0.435039	0.28208	0.444425	0.394543	0.478731	0.433217	0.0230674	10.2
0.644	0.477979	0.588763	0.606171	0.392802	0.473579	0.529633	0.527975	0.625431	0.540704	0.0276496	10.32				0.5096	0.394407	0.464915	0.489307	0.433788	0.281323	0.442913	0.393298	0.478203	0.431973	0.0230521	10.32
0.642322	0.477484	0.585517	0.604323	0.390035	0.473284	0.528619	0.524786	0.622769	0.538793	0.0275697	10.44				0.506751	0.391962	0.465691	0.489205	0.433328	0.280721	0.440432	0.390521	0.478187	0.430755	0.0230929	10.44
0.642694	0.475789	0.581881	0.602508	0.390148	0.473694	0.527517	0.521998	0.62018	0.537379	0.0273936	10.56				0.504187	0.391166	0.464506	0.488256	0.43029	0.280473	0.439126	0.389556	0.478365	0.429547	0.0229767	10.56
0.643101	0.473842	0.577878	0.600375	0.390019	0.472297	0.525953	0.519194	0.617888	0.535616	0.027307	10.68				0.50235	0.390878	0.463948	0.488642	0.427926	0.279339	0.43862	0.388638	0.478392	0.428748	0.0230254	10.68
0.6447	0.471259	0.574269	0.598847	0.39055	0.470455	0.524853	0.515941	0.61597	0.534094	0.0273258	10.8				0.500677	0.390341	0.462454	0.488459	0.426871	0.278003	0.436926	0.387394	0.478188	0.427701	0.0230607	10.8
0.646273	0.468694	0.570818	0.596554	0.38946	0.468785	0.521288	0.512872	0.614556	0.532144	0.0274747	10.92				0.499417	0.389567	0.462514	0.487871	0.424995	0.277998	0.435582	0.387399	0.477753	0.427011	0.0229841	10.92
0.648697	0.466659	0.5669	0.594038	0.388823	0.466273	0.518072	0.510789	0.612847	0.530344	0.0276208	11.04				0.498942	0.389005	0.463284	0.485277	0.42274	0.276559	0.434948	0.388241	0.476426	0.426158	0.0229688	11.04
0.649582	0.464453	0.563863	0.592036	0.387678	0.464597	0.515584	0.50859	0.611772	0.528684	0.0277543	11.16				0.498393	0.386642	0.463563	0.484405	0.421667	0.275404	0.435459	0.388722	0.476236	0.42561	0.0230673	11.16
0.649158	0.462171	0.560563	0.590069	0.38707	0.463962	0.514193	0.506617	0.610514	0.527146	0.0277232	11.28				0.497746	0.385045	0.462677	0.484999	0.420951	0.275842	0.435703	0.386399	0.476064	0.425047	0.0230893	11.28
0.647857	0.459692	0.558219	0.587717	0.387736	0.462151	0.513571	0.504861	0.610004	0.525756	0.0276245	11.4				0.496316	0.384243	0.46001	0.485934	0.420896	0.275035	0.435633	0.385311	0.475902	0.424364	0.0231144	11.4
0.64671	0.456609	0.556076	0.58523	0.38866	0.460651	0.513453	0.502067	0.609772	0.524359	0.0275518	11.52				0.495194	0.382422	0.460019	0.485898	0.42168	0.274978	0.435097	0.383829	0.476391	0.423945	0.0231603	11.52
0.646568	0.454042	0.552146	0.583576	0.387243	0.459599	0.513179	0.50012	0.609135	0.522845	0.0276465	11.64				0.493925	0.379958	0.460324	0.485713	0.420484	0.275848	0.434309	0.382739	0.476942	0.42336	0.023132	11.64
0.646625	0.451204	0.548935	0.581395	0.385801	0.45888	0.510752	0.498612	0.608239	0.52116	0.0277477	11.76				0.494014	0.378581	0.459956	0.484326	0.420856	0.275319	0.434287	0.381453	0.477643	0.422937	0.0232129	11.76
0.646427	0.448228	0.546449	0.578922	0.383743	0.456973	0.507372	0.496753	0.607214	0.51912	0.0279245	11.88				0.493852	0.376655	0.460831	0.483758	0.420311	0.274867	0.434478	0.379646	0.478839	0.422582	0.0233836	11.88
0.646934	0.446247	0.54336	0.577347	0.38372	0.452369	0.50631	0.494087	0.606277	0.517406	0.0280808	12				0.491689	0.3753	0.460478	0.48347	0.419817	0.273797	0.434761	0.378093	0.478667	0.421786	0.0234423	12
0.647337	0.444379	0.539712	0.575643	0.385659	0.449322	0.505653	0.49196	0.605243	0.516101	0.0280333	12.12				0.488902	0.375605	0.459386	0.485262	0.420255	0.274364	0.43471	0.376424	0.47842	0.421481	0.0233473	12.12
0.646791	0.442619	0.536364	0.574002	0.386469	0.446313	0.504302	0.489097	0.60478	0.514526	0.0280445	12.24				0.485981	0.375561	0.457243	0.487768	0.42339	0.27585	0.43661	0.376748	0.478151	0.421922	0.0231521	12.24
0.647456	0.440603	0.533144	0.572214	0.386033	0.443233	0.503122	0.487116	0.603898	0.51298	0.0281982	12.36				0.482169	0.373134	0.455801	0.489259	0.423748	0.276183	0.436965	0.375555	0.478422	0.421248	0.0231239	12.36
0.647908	0.439928	0.529501	0.570348	0.386366	0.441173	0.502131	0.484164	0.603852	0.511708	0.028256	12.48				0.478927	0.371812	0.454462	0.491041	0.426006	0.27667	0.435603	0.372316	0.477949	0.420532	0.0231184	12.48
0.647254	0.439798	0.525998	0.569234	0.386448	0.438953	0.501293	0.481657	0.602767	0.510378	0.0282174	12.6				0.47645	0.37089	0.452154	0.494323	0.427937	0.275788	0.436072	0.369616	0.47685	0.420009	0.0232872	12.6
0.646493	0.4389	0.522518	0.56787	0.385844	0.436339	0.500323	0.47986	0.601663	0.508868	0.0282411	12.72				0.474014	0.370271	0.450238	0.496712	0.429667	0.275108	0.436319	0.369724	0.476129	0.419798	0.0233395	12.72
0.645358	0.43638	0.518436	0.566755	0.387747	0.43377	0.500101	0.477778	0.599984	0.507368	0.0281271	12.84				0.472383	0.368755	0.44665	0.496774	0.431378	0.273531	0.436207	0.368526	0.475148	0.418817	0.0234219	12.84
0.644127	0.433796	0.514904	0.565544	0.38846	0.433507	0.500313	0.475256	0.598038	0.505994	0.0279972	12.96				0.469283	0.367082	0.442261	0.496333	0.43135	0.272943	0.435914	0.364397	0.473251	0.416979	0.0233941	12.96
0.642235	0.430398	0.510918	0.564825	0.389541	0.431836	0.500984	0.473715	0.595413	0.504429	0.0278546	13.08				0.466719	0.366615	0.43945	0.497775	0.430808	0.271676	0.435006	0.364203	0.471531	0.415976	0.0234002	13.08
0.640927	0.427319	0.506351	0.564195	0.390719	0.429556	0.50132	0.472382	0.593203	0.502886	0.0277852	13.2				0.465038	0.365852	0.434475	0.498744	0.431521	0.269373	0.434819	0.364045	0.471682	0.415061	0.0235684	13.2
0.639897	0.425722	0.502184	0.563475	0.392688	0.42733	0.50296	0.470618	0.591286	0.501796	0.0276625	13.32				0.462476	0.365167	0.429638	0.498702	0.431626	0.267553	0.432842	0.362974	0.471731	0.413634	0.0236295	13.32
0.63906	0.421933	0.496642	0.563782	0.394869	0.424698	0.504767	0.468797	0.589381	0.500437	0.0276933	13.44				0.45965	0.362603	0.425598	0.499688	0.432033	0.264813	0.431275	0.361036	0.470508	0.411912	0.0238752	13.44
0.634834	0.418388	0.492008	0.563448	0.396733	0.419104	0.506793	0.465456	0.588275	0.498338	0.0276751	13.56				0.457963	0.361985	0.420577	0.501581	0.43145	0.263054	0.429534	0.359811	0.469586	0.410616	0.0240386	13.56
0.631757	0.415638	0.486861	0.561438	0.395865	0.416482	0.507131	0.462412	0.586571	0.496017	0.0276533	13.68				0.455607	0.361337	0.41664	0.503013	0.429042	0.262774	0.427891	0.358848	0.468697	0.409317	0.0240253	13.68
0.628766	0.412135	0.48229	0.560937	0.395586	0.414225	0.508166	0.459629	0.585154	0.494099	0.0276942	13.8				0.454585	0.360328	0.411622	0.502813	0.429959	0.260673	0.426899	0.357765	0.468057	0.408078	0.0241869	13.8
0.625285	0.407146	0.477577	0.559455	0.394853	0.411998	0.508804	0.457092	0.583784	0.491777	0.0277604	13.92				0.454833	0.359254	0.405195	0.502368	0.430217	0.260212	0.426925	0.35696	0.466298	0.406918	0.0242008	13.92
0.621092	0.401204	0.472026	0.558732	0.392849	0.409782	0.509507	0.454888	0.581573	0.489073	0.0278841	14.04				0.452573	0.35863	0.403117	0.504201	0.430328	0.259922	0.42603	0.351967	0.464496	0.405696	0.0243633	14.04
0.618617	0.394809	0.466676	0.557238	0.390648	0.406115	0.511285	0.452192	0.579752	0.48637	0.028234	14.16				0.451231	0.357178	0.39976	0.505417	0.431062	0.258358	0.42475	0.348437	0.462722	0.404324	0.0246181	14.16
0.616077	0.38978	0.461044	0.555851	0.387892	0.400709	0.510268	0.449466	0.577372	0.483162	0.0285725	14.28				0.449341	0.355881	0.397653	0.505679	0.431229	0.256673	0.424606	0.345528	0.46103	0.403069	0.0248006	14.28
0.614285	0.385696	0.455754	0.553505	0.388866	0.399215	0.508463	0.446535	0.57535	0.480852	0.0285685	14.4				0.44886	0.355732	0.397772	0.505721	0.431327	0.256752	0.42389	0.343727	0.460233	0.402668	0.0248136	14.4
0.612349	0.380747	0.450562	0.550909	0.388909	0.397649	0.506643	0.444199	0.573923	0.478432	0.028658	14.52				0.449938	0.355585	0.396949	0.506616	0.431797	0.256237	0.424253	0.340477	0.458366	0.402246	0.0250039	14.52
0.611153	0.376521	0.445515	0.548346	0.38523	0.396642	0.505666	0.440427	0.571344	0.475649	0.0288909	14.64				0.451773	0.354261	0.395267	0.507069	0.431606	0.255137	0.423679	0.339437	0.459354	0.401954	0.0252653	14.64
0.610088	0.373701	0.440079	0.545532	0.380858	0.39528	0.505759	0.438321	0.568994	0.473179	0.0291116	14.76				0.453005	0.353754	0.394246	0.509478	0.429297	0.254346	0.423906	0.337679	0.459721	0.401715	0.0255592	14.76
0.605106	0.371101	0.43573	0.542244	0.378642	0.393395	0.505311	0.436997	0.565837	0.470485	0.0289064	14.88				0.453529	0.353342	0.394446	0.511596	0.428589	0.252847	0.424524	0.338684	0.460068	0.401958	0.0258018	14.88
0.601656	0.367822	0.431465	0.539232	0.373345	0.390896	0.503942	0.435064	0.562993	0.467379	0.0290138	15				0.455504	0.353134	0.393765	0.510372	0.429719	0.253523	0.425983	0.340741	0.459067	0.402423	0.0256741	15
0.598013	0.366667	0.427788	0.537026	0.370133	0.388013	0.502611	0.433046	0.561018	0.464924	0.0289914	15.12				0.454851	0.353214	0.391401	0.508478	0.43039	0.253828	0.424964	0.341406	0.4587	0.401915	0.0254945	15.12
0.593071	0.365182	0.4241	0.535232	0.366392	0.38755	0.503507	0.429942	0.559817	0.462755	0.0289516	15.24				0.455511	0.351804	0.389787	0.50894	0.431854	0.252739	0.424695	0.345314	0.458037	0.402076	0.0255514	15.24
0.5878	0.363232	0.421441	0.53412	0.360646	0.385164	0.502486	0.428455	0.556978	0.460036	0.0289525	15.36				0.456407	0.350228	0.389035	0.510709	0.431762	0.252726	0.425221	0.344383	0.457987	0.402051	0.0257628	15.36
0.584249	0.361142	0.418214	0.533186	0.359998	0.382733	0.502892	0.426692	0.553264	0.458041	0.0288426	15.48				0.456851	0.349441	0.387821	0.511226	0.430046	0.250924	0.424606	0.345203	0.457339	0.401495	0.0259031	15.48
0.581407	0.359303	0.415807	0.531351	0.360023	0.38006	0.504157	0.425905	0.54972	0.456415	0.0287121	15.6				0.455916	0.349406	0.387642	0.510055	0.429902	0.249707	0.423261	0.343938	0.456047	0.400653	0.0258883	15.6
0.580653	0.356448	0.412894	0.529668	0.359784	0.378842	0.504274	0.422721	0.54611	0.454599	0.0287434	15.72				0.45287	0.349462	0.38533	0.510192	0.428819	0.24671	0.422339	0.347091	0.455105	0.399769	0.0259191	15.72
0.57993	0.354057	0.410501	0.528617	0.361811	0.378011	0.506714	0.42061	0.542078	0.453592	0.0286816	15.84				0.452513	0.351385	0.383139	0.510262	0.428072	0.244213	0.422237	0.347062	0.452999	0.399098	0.0260126	15.84
0.578685	0.352178	0.408354	0.526451	0.362342	0.376613	0.507955	0.418622	0.538968	0.452241	0.0286238	15.96				0.450945	0.35359	0.383794	0.510751	0.427539	0.243377	0.421676	0.347562	0.451192	0.398936	0.0259264	15.96
0.577568	0.350061	0.406652	0.525188	0.360831	0.375477	0.509219	0.417297	0.536108	0.450933	0.0286942	16.08				0.448488	0.354204	0.38103	0.511131	0.42821	0.242515	0.423385	0.34942	0.451242	0.398847	0.0259472	16.08
0.576779	0.346798	0.405098	0.523683	0.360142	0.37346	0.509858	0.415282	0.53404	0.44946	0.0288555	16.2				0.447692	0.353674	0.376818	0.510685	0.423655	0.240352	0.423464	0.350909	0.450687	0.397548	0.026016	16.2
0.575511	0.344433	0.403408	0.520795	0.359918	0.372312	0.509777	0.41282	0.531832	0.447867	0.0288294	16.32				0.445769	0.354577	0.374506	0.509926	0.421134	0.238987	0.420304	0.350043	0.448741	0.395999	0.0259281	16.32
0.573939	0.33939	0.40282	0.518996	0.358049	0.371799	0.510217	0.410907	0.52991	0.446225	0.0290029	16.44				0.444643	0.351463	0.370651	0.509534	0.419677	0.239198	0.418936	0.344039	0.444487	0.393625	0.025969	16.44
0.574124	0.337225	0.402155	0.517223	0.35769	0.370866	0.511036	0.410357	0.527112	0.44531	0.0290501	16.56				0.442902	0.350198	0.367	0.506398	0.417708	0.239084	0.417352	0.340309	0.441605	0.391395	0.025784	16.56
0.572764	0.332384	0.40109	0.516258	0.357691	0.371061	0.511277	0.409352	0.52392	0.443977	0.0291033	16.68				0.440467	0.348388	0.364354	0.503749	0.415949	0.23984	0.414626	0.339196	0.439593	0.389574	0.0254792	16.68
0.572618	0.326671	0.399741	0.515853	0.355772	0.371359	0.513534	0.408037	0.520279	0.442652	0.0294443	16.8				0.439308	0.348484	0.364447	0.503424	0.416604	0.23887	0.412922	0.335977	0.438411	0.388716	0.0255478	16.8
0.573032	0.323193	0.398042	0.512062	0.354315	0.371134	0.513913	0.406059	0.516994	0.440972	0.0295602	16.92				0.438334	0.349377	0.362063	0.503326	0.416767	0.236846	0.413078	0.331857	0.43694	0.387621	0.0257789	16.92
0.576298	0.321511	0.398033	0.509886	0.351403	0.370622	0.513227	0.403612	0.512327	0.439658	0.0297772	17.04				0.436459	0.348152	0.36041	0.505821	0.41842	0.234597	0.414171	0.329206	0.435892	0.387014	0.0262106	17.04
0.577024	0.320407	0.397556	0.505565	0.350384	0.369595	0.512314	0.402391	0.507888	0.438125	0.0296711	17.16				0.433951	0.345131	0.359228	0.505998	0.419287	0.233015	0.413228	0.327088	0.43369	0.385624	0.0263743	17.16
0.576232	0.320393	0.396461	0.502011	0.3489	0.370999	0.511786	0.401869	0.502038	0.436743	0.029351	17.28				0.432691	0.345389	0.358542	0.507872	0.421021	0.231874	0.410018	0.324186	0.430873	0.384718	0.0265659	17.28
0.573238	0.32129	0.394627	0.500359	0.351613	0.372727	0.511277	0.402714	0.49767	0.436168	0.0287587	17.4				0.432829	0.346288	0.358906	0.508265	0.421907	0.22779	0.406281	0.323279	0.429226	0.383863	0.02686	17.4
0.572769	0.321684	0.393725	0.49761	0.353729	0.373362	0.509083	0.40324	0.493335	0.435393	0.0283204	17.52				0.433087	0.34586	0.356225	0.508064	0.423596	0.226932	0.402995	0.318123	0.427671	0.382506	0.0270938	17.52
0.571688	0.325056	0.391668	0.496081	0.354767	0.373146	0.505747	0.403044	0.488499	0.434411	0.027771	17.64				0.436477	0.345139	0.355976	0.509407	0.424131	0.228365	0.399883	0.318037	0.425902	0.382591	0.0271186	17.64
0.571416	0.327141	0.390066	0.49456	0.356838	0.372083	0.504616	0.402841	0.484698	0.433807	0.0274406	17.76				0.438367	0.344911	0.353369	0.513816	0.425796	0.229723	0.39691	0.314737	0.424043	0.382408	0.0274791	17.76
0.569981	0.328577	0.38952	0.493136	0.356752	0.371828	0.504581	0.401817	0.481954	0.433127	0.0271884	17.88				0.439694	0.344302	0.351379	0.513163	0.421353	0.231962	0.39357	0.315201	0.422167	0.381421	0.0271717	17.88
0.56973	0.328752	0.38906	0.491569	0.354441	0.374084	0.503921	0.40146	0.480247	0.432585	0.0270857	18				0.44154	0.345192	0.347642	0.511526	0.419908	0.234864	0.391356	0.313848	0.422329	0.380912	0.0269494	18
0.569471	0.328977	0.386779	0.491002	0.350612	0.371395	0.503513	0.402247	0.478141	0.431349	0.0272488	18.12				0.445074	0.347584	0.345731	0.513324	0.419343	0.235252	0.393244	0.318293	0.420034	0.381987	0.0269478	18.12
0.568969	0.329451	0.385725	0.490288	0.348511	0.368917	0.500943	0.402201	0.475254	0.430029	0.0271934	18.24				0.44931	0.348458	0.342894	0.511637	0.421103	0.234687	0.393793	0.3224	0.418505	0.382532	0.0269367	18.24
0.564563	0.328715	0.384109	0.487531	0.346864	0.366358	0.499228	0.402554	0.474935	0.428317	0.0269472	18.36				0.452382	0.347468	0.339364	0.508618	0.42014	0.233688	0.393904	0.323596	0.41475	0.381546	0.0268924	18.36
0.559822	0.329931	0.383496	0.486304	0.347856	0.365318	0.500619	0.402411	0.474163	0.427769	0.0265585	18.48				0.456055	0.344081	0.336658	0.507452	0.420148	0.233153	0.395236	0.324983	0.411529	0.381033	0.027033	18.48
0.559266	0.329386	0.384341	0.484396	0.35054	0.362724	0.501063	0.402224	0.473238	0.427464	0.0264443	18.6				0.455684	0.340402	0.336018	0.507961	0.417683	0.237571	0.395597	0.325841	0.407753	0.380501	0.026681	18.6
0.561945	0.329522	0.385322	0.479987	0.352466	0.359695	0.500331	0.399872	0.473227	0.42693	0.0265079	18.72				0.456541	0.338787	0.336086	0.505644	0.414825	0.240273	0.396509	0.327473	0.404163	0.380033	0.026253	18.72
0.563724	0.330326	0.383868	0.478213	0.355669	0.356603	0.498186	0.399157	0.473317	0.426563	0.0264975	18.84				0.458135	0.336545	0.336571	0.50541	0.415759	0.242235	0.397384	0.328619	0.401546	0.380245	0.0261595	18.84
0.560786	0.326593	0.383652	0.475226	0.360497	0.351028	0.497431	0.397694	0.474636	0.425283	0.0264684	18.96				0.457299	0.333962	0.335759	0.504795	0.414712	0.244142	0.39533	0.332919	0.397651	0.379619	0.0258333	18.96
0.561133	0.324143	0.383263	0.472591	0.36391	0.349455	0.496751	0.39538	0.47546	0.424676	0.0265417	19.08				0.458953	0.331771	0.329075	0.501556	0.415887	0.244396	0.397085	0.338449	0.394991	0.379129	0.0257772	19.08
0.563406	0.320357	0.380584	0.47006	0.364918	0.348191	0.497093	0.394402	0.474871	0.423765	0.0269325	19.2				0.461163	0.328127	0.327798	0.500977	0.418311	0.245818	0.400501	0.341569	0.391316	0.379509	0.025856	19.2
0.566476	0.317739	0.381549	0.466273	0.365545	0.346089	0.497089	0.393118	0.476234	0.423346	0.0273067	19.32				0.462607	0.325955	0.329273	0.499787	0.422179	0.246467	0.403544	0.342667	0.389635	0.380235	0.0259051	19.32
0.56856	0.314594	0.381932	0.463975	0.365121	0.345897	0.495677	0.390552	0.477054	0.422596	0.0276021	19.44				0.464253	0.325276	0.325855	0.501496	0.428458	0.248619	0.404444	0.341952	0.383639	0.380444	0.0262075	19.44
0.568954	0.310611	0.384701	0.462631	0.364957	0.348004	0.496782	0.388319	0.477817	0.422531	0.0277924	19.56				0.464061	0.324852	0.325193	0.498362	0.429822	0.249479	0.408529	0.340829	0.380565	0.380188	0.026084	19.56
0.568815	0.304784	0.387068	0.4614	0.362655	0.348257	0.497956	0.386939	0.476799	0.42163	0.0281432	19.68				0.465211	0.325165	0.324682	0.496692	0.432219	0.249557	0.407779	0.338719	0.376262	0.379587	0.0261341	19.68
0.571357	0.30184	0.386457	0.456909	0.361844	0.350224	0.497403	0.387616	0.476781	0.421159	0.0283483	19.8				0.46487	0.322749	0.321054	0.499124	0.434465	0.24917	0.406538	0.341307	0.373472	0.379194	0.0264751	19.8
0.570483	0.300377	0.386477	0.453801	0.35903	0.349435	0.498592	0.385731	0.480242	0.420463	0.0286007	19.92				0.464287	0.315155	0.319652	0.494097	0.439233	0.246483	0.403853	0.342717	0.369369	0.377205	0.0266943	19.92
0.569043	0.300857	0.388247	0.452523	0.355849	0.350531	0.498939	0.384927	0.486026	0.420771	0.0286821	20.04				0.465357	0.310077	0.313703	0.493152	0.442475	0.245332	0.402088	0.342575	0.363958	0.375413	0.0272256	20.04
0.571126	0.300132	0.389237	0.449364	0.356291	0.344787	0.50626	0.384042	0.489669	0.421212	0.0294171	20.16				0.463629	0.304446	0.3124	0.48885	0.445507	0.240718	0.397758	0.347212	0.35655	0.373008	0.0274649	20.16
0.573994	0.29927	0.391591	0.446001	0.360345	0.341039	0.509044	0.382799	0.492285	0.421819	0.0298316	20.28				0.462815	0.295862	0.316029	0.481805	0.442426	0.236436	0.397791	0.346165	0.349836	0.369907	0.0274763	20.28
0.575281	0.296652	0.396351	0.439216	0.361412	0.334543	0.509709	0.381804	0.495932	0.421211	0.0303338	20.4				0.467896	0.285247	0.318568	0.474129	0.441316	0.232027	0.397452	0.34174	0.346614	0.367221	0.0279898	20.4
0.575663	0.293473	0.399299	0.43172	0.366356	0.330488	0.513255	0.383394	0.499699	0.421483	0.0307464	20.52				0.469789	0.278762	0.317789	0.470793	0.444295	0.22999	0.396402	0.335686	0.340683	0.36491	0.0285751	20.52
0.575609	0.296724	0.401393	0.429903	0.369679	0.322819	0.508831	0.388507	0.50524	0.422078	0.0307186	20.64				0.471111	0.274195	0.319963	0.46871	0.446905	0.227535	0.398328	0.336033	0.334411	0.364132	0.0290529	20.64
0.568415	0.298458	0.398103	0.428788	0.376709	0.317049	0.505754	0.38677	0.512712	0.421418	0.0304742	20.76				0.471254	0.267497	0.327228	0.472175	0.449951	0.228414	0.400014	0.337356	0.334557	0.365383	0.0294623	20.76
0.567007	0.303178	0.399398	0.42228	0.382597	0.315724	0.502725	0.385512	0.517795	0.421802	0.0301681	20.88				0.47025	0.264184	0.334521	0.472832	0.456942	0.231268	0.402637	0.338477	0.330372	0.366831	0.0296799	20.88
0.566425	0.30434	0.394596	0.411902	0.384249	0.316671	0.49352	0.388668	0.521846	0.420246	0.0298707	21				0.473641	0.253794	0.338113	0.467422	0.467014	0.234978	0.404515	0.332148	0.325631	0.366362	0.0304752	21
0.564889	0.29491	0.399303	0.409308	0.38327	0.317019	0.486022	0.384646	0.522995	0.41804	0.03012	21.12				0.476352	0.249005	0.346058	0.457338	0.463603	0.23811	0.406262	0.326682	0.32808	0.365721	0.0300675	21.12
0.572578	0.282735	0.394784	0.411155	0.383905	0.313573	0.488733	0.379669	0.524542	0.416853	0.0317665	21.24				0.473005	0.239432	0.335942	0.454424	0.464815	0.233913	0.410417	0.321379	0.327109	0.362271	0.0309018	21.24
0.561262	0.287218	0.383582	0.403198	0.391317	0.311754	0.499842	0.377227	0.527013	0.415824	0.031454	21.36				0.455775	0.230326	0.340293	0.44336	0.459159	0.231647	0.414287	0.315276	0.326688	0.357423	0.0301915	21.36
0.541835	0.295486	0.3787	0.385999	0.408334	0.31419	0.527948	0.367962	0.529785	0.416693	0.0313706	21.48				0.456938	0.2181	0.341188	0.441593	0.438286	0.231344	0.423622	0.318769	0.335649	0.356165	0.0301463	21.48
0.479442	0.310947	0.369863	0.374333	0.41112	0.319497	0.520145	0.355608	0.527348	0.407589	0.027517	21.6				0.448812	0.225051	0.3559	0.46472	0.41255	0.223687	0.422189	0.319622	0.320065	0.354733	0.030108	21.6
