# Supplementary material for: SABRE populates ER domains essential for cell plate maturation and cell expansion influencing cell and tissue patterning
Source: eLife. 2021 Mar 9;10:e65166. doi: 10.7554/eLife.65166 (PMC7987345; doi:10.7554/eLife.65166)
Supplement: Figure 2—source data 1. [file elife-65166-fig2-data1.xlsx]

## Sheet: Figure 2 A source data
Protonemal Subapical Cell Length (µm)
WT	∆sabre
135.38	71.179
113.7	37.777
93.457	64.869
80.92	63.151
80.589	81.728
85.041	64.56
86.77	51.884
106.45	58.138
100	56.801
80.722	54.918
114.02	56.036
92.484	80.003
89.854	60.033
119.53	67.676
81.134	66.242
76.251	39.395
74.001	67.106
54	73.223
68.41	79.422
58.412	69.985
79.743	56.569
102.93	63.561
78.695	64.857
78.816	41.231
69.857	61.612
82	50.636
73.005	79.699
59.34	58.241
90.554	40
93.701	77.201
98.082	59.291
114.77	44.407
112.61	66.603
109.31	68.118
65.299	58.31
80	46.861
70	53.74
106.77	52.498
78.435	41.761
101.39	67.676
76.237	70.631
58.138	66.753
75.286	60.166
67.231	45.695
101.92	68.264
82.607	65.115
69.857	46.174
100.08	66.03
65.146	53.666
83.716	66.121
79.624	60.033
69.426	70
90.537	69.311
75.392
68.118
88
