# Supplementary material for: SABRE populates ER domains essential for cell plate maturation and cell expansion influencing cell and tissue patterning
Source: eLife. 2021 Mar 9;10:e65166. doi: 10.7554/eLife.65166 (PMC7987345; doi:10.7554/eLife.65166)
Supplement: Figure 2—source data 2. [file elife-65166-fig2-data2.xlsx]

## Sheet: Figure 2 E F source data
E	Cell area (µm^2)					F	Bounding ellipse major/minor axis ratio
wild type base	∆sabre base	wild type tip	∆sabre tip			wild type base	∆sabre base	wild type tip	∆sabre tip
5418.5	2240.3	1078.4	934.76			3.7381	2.8483	3.0181	3.2748
3128.7	1667.1	990.38	821.97			7.5573	3.8846	1.7619	2.8459
1698	2297.5	1413.7	667.46			3.3165	4.5775	5.4791	1.8877
2262	2354.7	764.8	658.19			3.6476	4.3845	1.5988	2.4038
2651.3	1835.5	1021.3	590.21			2.9712	3.7709	2.3901	1.8206
4337	2153.8	738.53	622.66			3.2775	2.3876	2.91	1.6883
3375.9	1792.3	699.91	466.61			3.9968	2.7084	2.5901	1.9178
2824.4	2000.8	613.38	764.8			3.2994	2.955	1.5366	1.6315
2594.1	1786.1	613.38	545.4			4.298	3.0382	1.7073	2.1247
2333	1248.4	1699.6	647.38			4.4182	2.1991	4.608	2.0747
1694.9	1364.3	838.96	602.57			2.2592	5.1911	2.4884	1.7462
2127.5	1881.9	1109.3	631.93			9.9557	2.3317	4.2703	1.4681
1664	2007	616.47	716.9			10.028	4.441	2.5648	3.4059
1732	1216	964.11	733.9			3.0747	2.0791	3.7558	1.8903
2388.6	1027.5	1018.2	525.32			4.5822	2.5057	8.0943	1.4094
534.59	846.69	2056.5	553.13			3.4176	2.5359	5.0332	2.0427
911.58	1149.5	769.43	706.09			5.087	1.7903	4.1189	2.6993
2419.5	1311.7	1117.1	664.37			5.2091	1.4242	3.0968	3.8572
254.93	916.21	1211.3	284.29			2.4248	2.8204	2.7675	1.2139
	1328.7	1143.3	641.2				3.6681	2.9291	1.953
	1367.4	872.95	565.49				4.7428	2.7476	3.5865
	1776.8	645.83	341.46				5.0497	4.7106	1.1684
	2255.8	1002.7	454.24				4.4986	3.4745	1.8292
	1608.4	267.29	463.52				3.6998	1.8222	1.5588
	1501.8	1016.6	570.12				1.8276	3.2135	1.6851
	1389	1041.4	965.66				4.0915	3.0807	3.427
	1925.1	1265.4	460.42				5.2023	3.2791	1.6805
	1390.5	1372	648.92				2.6892	2.8151	2.3913
	1382.8	1005.8	602.57				1.0761	3.963	2.7801
	1424.5	347.64	639.65				3.2174	2.002	2.7232
	1710.4	922.39	356.91				2.7216	6.1113	1.4381
	1271.6	1063	522.23				3.3695	6.0312	1.8434
	1042.9	1056.8	985.74				3.2896	4.5926	3.9157
	902.31	1239.1	421.8				2.5811	3.2194	1.7575
	1075.4	1036.7	573.21				2.5859	4.3691	1.8144
	930.12	1182	750.89				1.5048	3.4443	2.2737
	803.43	1192.8	605.66				1.9279	3.4022	1.5528
	1138.7		254.93				2.2175		1.528
	1704.2		652.01				2.3301		3.2569
	778.71		407.89				2.2795		1.3929
	1242.2		662.83				2.1187		2.289
	942.48		610.29				2.2039		2.2133
	613.38		546.95				6.332		2.5909
	1316.4		511.41				3.8234		2.197
	1813.9		712.27				2.9527		2.9959
	1602.2		565.49				2.7935		2.5202
	656.65		537.68				3.3087		3.8883
	740.08		639.65				2.446		5.4514
	2499.9		546.95				2.137		2.2399
	971.84		395.53				2.8213		2.0297
	1158.8		400.17				3.5557		1.9894
	669.01		352.27				2.3479		2.289
			505.23						2.3575
			409.44						1.2208
			360						2.3523
			278.11						1.6416
			356.91						1.5597
			579.39						2.2395
			361.54						1.2396
			387.81						1.4261
			389.35						1.6172
			644.29						1.1955
			699.91						2.1673
			891.49						1.8743
			373.9						1.4425
			682.91						1.0296
			397.08						1.2217
			978.02						2.6292
			539.22						1.4762
			376.99						1.3472
			1001.2						3.4403
			570.12						1.2527
			537.68						1.6485
			923.94						1.3876
			964.11						2.5008
			718.45						1.8709
			437.25						3.5969
			995.01						2.9938
			869.86						2.8751
			557.76						3.8236
			706.09						3.427
			662.83						2.4104
			550.04						3.182
			324.46						3.8853
			562.4						2.238
			611.84						2.5745
			662.83						2.6681
			386.26						2.651
			619.57						2.362
			434.16						2.1496
			426.43						3.3753
			577.85						3.1557
			624.2						2.3937
			631.93						3.0126
			344.55						3.8048
			514.5						3.5677
			483.6						3.4273
			491.33						1.8614
			574.76						2.5453
			508.32						2.1259
			494.42						2.3991
			480.51						1.5704
			302.83						1.6605
			511.41						2.0624
			910.03						1.4281
			358.45						2.9794
			593.3						2.5137
			389.35						1.9431
			571.67						1.7383
			406.35						3.9664
			863.68						3.0299
			866.77						2.6042
			489.78						2.2751
			298.19						2.4458
			492.87						1.6547
			750.89						3.2171
			491.33						1.7719
			511.41						1.8205
			395.53						1.5746
			415.62						1.8478
			367.72						1.9434
			667.46						3.7104
			556.22						1.9824
			809.61						2.9828
