# Supplementary material for: SABRE populates ER domains essential for cell plate maturation and cell expansion influencing cell and tissue patterning
Source: eLife. 2021 Mar 9;10:e65166. doi: 10.7554/eLife.65166 (PMC7987345; doi:10.7554/eLife.65166)
Supplement: Figure 3—figure supplement 1—source data 1. [file elife-65166-fig3-figsupp1-data1.xlsx]

## Sheet: Figure 3S1 B source data
Control average	Control STD	Control SE	time(s)		∆sabre average	∆sabre STD	∆sabre SE	time(s)
1.0172	0.014284	0.0036882	0		1.0204	0.010546	0.0027229	0
1.0007	0.010734	0.0027715	1.116		1.0017	0.007279	0.0018794	1.116
0.99665	0.0041945	0.001083	2.196		0.99559	0.0044937	0.0011603	2.196
0.99513	0.0058484	0.0015101	3.276		0.99551	0.0048185	0.0012441	3.276
0.99475	0.0086691	0.0022383	4.354		0.99493	0.0066506	0.0017172	4.354
0.99553	0.013332	0.0034423	5.428		0.99192	0.011916	0.0030768	5.428
0.57691	0.070389	0.018174	8.06		0.52372	0.071543	0.018472	8.06
0.58058	0.070978	0.018326	9.134		0.52664	0.071506	0.018463	9.134
0.58563	0.06851	0.017689	10.212		0.53167	0.070246	0.018137	10.212
0.58955	0.069117	0.017846	11.292		0.53553	0.069332	0.017901	11.292
0.5945	0.06802	0.017563	12.372		0.54077	0.070838	0.01829	12.372
0.59671	0.065466	0.016903	13.454		0.54654	0.06857	0.017705	13.454
0.60059	0.064407	0.01663	14.526		0.55343	0.070893	0.018305	14.526
0.60467	0.062406	0.016113	15.606		0.55814	0.071972	0.018583	15.606
0.61182	0.062822	0.016221	16.68		0.5655	0.072651	0.018758	16.68
0.61474	0.061746	0.015943	17.76		0.57191	0.07455	0.019249	17.76
0.62196	0.061997	0.016008	18.84		0.57982	0.074995	0.019364	18.84
0.62669	0.061901	0.015983	19.93		0.58465	0.074379	0.019205	19.93
0.63259	0.062321	0.016091	21.002		0.5895	0.074543	0.019247	21.002
0.63821	0.062641	0.016174	22.082		0.59422	0.074282	0.019179	22.082
0.64352	0.061923	0.015989	23.163		0.5973	0.072881	0.018818	23.163
0.64815	0.061573	0.015898	24.243		0.60021	0.072136	0.018625	24.243
0.65335	0.061599	0.015905	25.323		0.6058	0.070536	0.018212	25.323
0.65853	0.062235	0.016069	26.403		0.60865	0.069973	0.018067	26.403
0.66523	0.060195	0.015542	27.481		0.61424	0.069136	0.017851	27.481
0.67028	0.058703	0.015157	28.561		0.61787	0.069145	0.017853	28.561
0.67501	0.058989	0.015231	29.641		0.62346	0.067935	0.017541	29.641
0.67702	0.05963	0.015396	30.717		0.62687	0.0685	0.017687	30.717
0.68076	0.060586	0.015643	31.797		0.62974	0.066946	0.017285	31.797
0.68508	0.061148	0.015788	32.877		0.6323	0.067784	0.017502	32.877
0.68628	0.061943	0.015994	33.955		0.63542	0.067037	0.017309	33.955
0.68925	0.062244	0.016071	35.035		0.63875	0.06735	0.01739	35.035
0.69044	0.063069	0.016284	36.115		0.64152	0.066026	0.017048	36.115
0.69408	0.062685	0.016185	37.195		0.64272	0.064816	0.016735	37.195
0.69654	0.063167	0.01631	38.275		0.64679	0.065216	0.016839	38.275
0.69924	0.061211	0.015805	39.355		0.64935	0.063895	0.016498	39.355
0.70171	0.061506	0.015881	40.429		0.65153	0.065276	0.016854	40.429
0.7043	0.064937	0.016767	41.515		0.6554	0.064781	0.016726	41.515
0.70439	0.064803	0.016732	42.595		0.65859	0.065944	0.017027	42.595
0.70791	0.066234	0.017101	43.679		0.66357	0.067089	0.017322	43.679
0.70979	0.066314	0.017122	44.759		0.66813	0.066845	0.017259	44.759
0.71266	0.068037	0.017567	45.837		0.67234	0.06804	0.017568	45.837
0.71465	0.071264	0.0184	46.929		0.67729	0.068668	0.01773	46.929
0.7184	0.072524	0.018726	48.007		0.68024	0.066624	0.017202	48.007
0.72071	0.071625	0.018494	49.087		0.68443	0.068826	0.017771	49.087
0.72446	0.071864	0.018555	50.179		0.68658	0.068161	0.017599	50.179
0.7296	0.076106	0.01965	51.259		0.68578	0.067364	0.017393	51.259
0.73127	0.077733	0.020071	52.339		0.68849	0.067498	0.017428	52.339
0.73298	0.075502	0.019495	53.429		0.69094	0.067643	0.017465	53.429
0.73529	0.076078	0.019643	54.509		0.69438	0.066566	0.017187	54.509
0.73499	0.074712	0.01929	55.589		0.69647	0.065813	0.016993	55.589
0.73613	0.072499	0.018719	56.679		0.69873	0.067419	0.017408	56.679
0.73825	0.074764	0.019304	57.759		0.70136	0.06992	0.018053	57.759
0.73858	0.07359	0.019001	58.839		0.70353	0.071525	0.018468	58.839
0.73778	0.071699	0.018513	59.927		0.70621	0.071515	0.018465	59.927
0.74202	0.07257	0.018737	61.001		0.70681	0.071384	0.018431	61.001
0.74166	0.072222	0.018648	62.081		0.71032	0.072401	0.018694	62.081
0.7443	0.072251	0.018655	63.161		0.71114	0.071953	0.018578	63.161
0.74259	0.070245	0.018137	64.241		0.70948	0.071649	0.0185	64.241
0.74642	0.071977	0.018584	65.321		0.71337	0.073833	0.019064	65.321
0.74459	0.072381	0.018689	66.401		0.71592	0.074296	0.019183	66.401
0.74593	0.07256	0.018735	67.481		0.71657	0.074256	0.019173	67.481
0.74548	0.074949	0.019352	68.559		0.71683	0.07385	0.019068	68.559
0.74526	0.075958	0.019612	69.639		0.71879	0.073183	0.018896	69.639
0.74935	0.07807	0.020158	70.717		0.72095	0.072195	0.018641	70.717
0.74966	0.076992	0.019879	71.797		0.72137	0.071623	0.018493	71.797
0.74912	0.07383	0.019063	72.877		0.72287	0.072081	0.018611	72.877
0.74993	0.075335	0.019451	73.955		0.72594	0.07199	0.018588	73.955
0.74999	0.074849	0.019326	75.035		0.72479	0.070207	0.018127	75.035
0.75085	0.073898	0.01908	76.115		0.72828	0.070834	0.018289	76.115
0.75245	0.072685	0.018767	77.194		0.72804	0.070786	0.018277	77.194
0.7519	0.072674	0.018764	78.274		0.73082	0.070042	0.018085	78.274
0.75232	0.074378	0.019204	79.354		0.73011	0.071809	0.018541	79.354
0.75307	0.07316	0.01889	80.434		0.73219	0.072398	0.018693	80.434
0.75169	0.074009	0.019109	81.518		0.7326	0.071948	0.018577	81.518
0.75348	0.074492	0.019234	82.598		0.73481	0.072183	0.018638	82.598
0.75325	0.076537	0.019762	83.678		0.73375	0.070212	0.018129	83.678
0.75477	0.0761	0.019649	84.758		0.73506	0.070167	0.018117	84.758
0.75534	0.0764	0.019726	85.838		0.73491	0.072733	0.018779	85.838
0.75417	0.076354	0.019714	86.928		0.734	0.074197	0.019158	86.928
0.75568	0.078691	0.020318	88.008		0.73372	0.07704	0.019892	88.008
0.75714	0.080499	0.020785	89.08		0.7338	0.078088	0.020162	89.08
0.75578	0.078007	0.020141	90.16		0.7356	0.079415	0.020505	90.16
0.756	0.079479	0.020521	91.24		0.73431	0.077294	0.019957	91.24
0.75628	0.078692	0.020318	92.32		0.73621	0.082001	0.021172	92.32
0.75433	0.07844	0.020253	93.4		0.73404	0.082071	0.021191	93.4
0.75771	0.080474	0.020778	94.478		0.73353	0.084256	0.021755	94.478
0.75858	0.080333	0.020742	95.556		0.73419	0.084958	0.021936	95.556
0.75952	0.082398	0.021275	96.636		0.73242	0.08629	0.02228	96.636
0.761	0.086179	0.022251	97.714		0.7335	0.087392	0.022564	97.714
0.7642	0.083015	0.021434	98.794		0.7355	0.087975	0.022715	98.794
0.76425	0.08332	0.021513	99.874		0.73625	0.088575	0.02287	99.874
0.76643	0.085383	0.022046	100.95		0.73702	0.087402	0.022567	100.95
0.76674	0.087064	0.02248	102.03		0.73544	0.086436	0.022318	102.03
0.76748	0.086923	0.022443	103.11		0.73827	0.087016	0.022467	103.11
0.77045	0.085657	0.022117	104.19		0.74072	0.087566	0.02261	104.19
0.76954	0.085614	0.022106	105.27		0.74246	0.08725	0.022528	105.27
0.77088	0.087338	0.02255	106.35		0.74389	0.086451	0.022321	106.35
0.77173	0.089502	0.023109	107.43		0.74249	0.085703	0.022129	107.43
0.76987	0.093544	0.024153	108.51		0.7442	0.087454	0.022581	108.51
0.76762	0.092848	0.023973	109.59		0.74511	0.088045	0.022733	109.59
0.76595	0.09321	0.024067	110.68		0.7435	0.086176	0.02225	110.68
0.76797	0.094611	0.024429	111.76		0.74483	0.08763	0.022626	111.76
0.76641	0.095842	0.024746	112.84		0.74511	0.087553	0.022606	112.84
0.7687	0.095111	0.024558	113.92		0.74529	0.089086	0.023002	113.92
0.7693	0.093521	0.024147	115		0.74415	0.091309	0.023576	115
0.77	0.091126	0.023529	116.08		0.74354	0.091595	0.02365	116.08
0.77101	0.090776	0.023438	117.17		0.74402	0.091808	0.023705	117.17
0.76892	0.090214	0.023293	118.25		0.74369	0.089745	0.023172	118.25
0.77169	0.090915	0.023474	119.33		0.7434	0.091218	0.023552	119.33
0.77124	0.092032	0.023762	120.42		0.744	0.091742	0.023688	120.42
0.77179	0.092079	0.023775	121.5		0.74268	0.093861	0.024235	121.5
0.77127	0.09243	0.023865	122.58		0.74196	0.091096	0.023521	122.58
0.77257	0.091128	0.023529	123.67		0.74417	0.091532	0.023633	123.67
0.7728	0.092513	0.023887	124.75		0.7448	0.090817	0.023449	124.75
0.77087	0.090703	0.023419	125.83		0.74405	0.091116	0.023526	125.83
0.76865	0.090023	0.023244	126.93		0.7439	0.093243	0.024075	126.93
0.77128	0.091828	0.02371	128.01		0.74118	0.093806	0.024221	128.01
0.76937	0.091271	0.023566	129.09		0.74239	0.092958	0.024002	129.09
0.77129	0.094745	0.024463	130.18		0.74231	0.09461	0.024428	130.18
0.77026	0.095355	0.024621	131.26		0.74095	0.091332	0.023582	131.26
0.7693	0.0958	0.024735	132.34		0.74323	0.092075	0.023774	132.34
0.77158	0.096895	0.025018	133.43		0.74242	0.094737	0.024461	133.43
0.77237	0.094866	0.024494	134.51		0.74358	0.095213	0.024584	134.51
0.77213	0.096855	0.025008	135.59		0.74443	0.096415	0.024894	135.59
0.77089	0.096945	0.025031	136.68		0.74461	0.098513	0.025436	136.68
