# Supplementary material for: SABRE populates ER domains essential for cell plate maturation and cell expansion influencing cell and tissue patterning
Source: eLife. 2021 Mar 9;10:e65166. doi: 10.7554/eLife.65166 (PMC7987345; doi:10.7554/eLife.65166)
Supplement: Figure 4—figure supplement 2—source data 1. [file elife-65166-fig4-figsupp2-data1.xlsx]

## Sheet: Figure 4S2 A B source data
A	Normalized Area									B	Normalized area
wild type	SAB-3GFP	LAmRuby	SAB-3mNG/LA	mCh-Tub	SAB-3mNG-Tub					SAB-3mNG/LAmRuby	OE-SAB-3mNG/LAmRuby
1.65	0.44741	0.46889	0.31323	0.3853	0.2629					0.31173	0.37441
0.37107	0.52102	0.51311	0.40929	0.42632	0.41083					0.57769	0.4242
0.69332	0.55979	0.67095	0.44322	0.4522	0.47218					0.59748	0.45599
1.5752	0.56761	0.69314	0.46083	0.51184	0.50538					0.78322	0.50459
0.72996	0.57837	0.70668	0.47213	0.56811	0.58322					0.81305	0.51776
1.0152	0.58773	0.75335	0.47494	0.59898	0.61117					0.98793	0.6165
0.80807	0.63473	0.78562	0.49128	0.60777	0.69467					0.99031	0.66124
0.44274	0.64137	0.79314	0.51576	0.61994	0.71591					1.0036	0.67509
0.47102	0.64301	0.83099	0.54037	0.62413	0.71629					1.0122	0.74086
1.0914	0.64632	0.8636	0.54769	0.64353	0.71747					1.0749	0.80284
0.84848	0.66981	0.89838	0.55265	0.64824	0.73501					1.1365	0.97632
2.5393	0.67528	0.91271	0.56457	0.65441	0.73954					1.2019	1.0957
0.44454	0.69173	0.93287	0.56532	0.68504	0.74218					1.319	1.1002
1.2891	0.70326	0.95372	0.59136	0.70152	0.77184					1.5239	1.1683
1.4171	0.77163	1.0015	0.59712	0.71213	0.79471					1.6666	1.2711
1.3845	0.85677	1.0368	0.62637	0.73519	0.79928						1.2907
0.52369	0.93079	1.081	0.62748	0.76184	0.80304						1.2968
1.2723	0.94606	1.1094	0.647	0.78007	0.81442						1.3448
0.49618	0.95486	1.1569	0.67985	0.83702	0.8197						1.7506
0.93673	0.96125	1.4316	0.70954	0.84017	0.84254						1.7912
	0.97666	2.2032	0.71095	0.86994	0.86076
	0.9968	0.47234	0.71709	0.88968	0.86158
	1.0164	0.61169	0.71768	0.89167	0.89408
	1.0337	0.68765	0.7264	0.92113	0.92451
	1.0419	0.70131	0.74231	0.92254	0.93598
	1.0725	0.74857	0.76339	0.93183	0.94402
	1.0926	0.77027	0.78061	0.95196	0.96965
	1.1417	0.78838	0.79462	0.96159	0.98327
	1.1627	0.79735	0.84488	1.0115	1.0168
	1.1719	0.83636	0.85154	1.0312	1.03
	1.1736	0.87064	0.85379	1.0588	1.0404
	1.1784	0.89947	0.85388	1.0713	1.0785
	1.2257	0.9317	0.86083	1.156	1.0857
	1.2427	0.95179	0.87048	1.1693	1.1166
	1.2498	0.9992	0.89777	1.1792	1.3281
	1.2599	1.007	0.94242	1.1901	1.3592
	1.4295	1.0482	0.9484	1.2397	1.3699
	1.4627	1.1069	0.97622	1.2422	1.6177
	1.4918	1.1399	0.97629	1.2452	1.7223
	1.6638	1.3536	1.0434	1.2745	2.074
	2.1573	1.4433	1.2472	1.2996
			1.3676	1.4987
			1.3699	1.7875
			1.5458
