# Supplementary material for: SABRE populates ER domains essential for cell plate maturation and cell expansion influencing cell and tissue patterning
Source: eLife. 2021 Mar 9;10:e65166. doi: 10.7554/eLife.65166 (PMC7987345; doi:10.7554/eLife.65166)
Supplement: Figure 4—figure supplement 3—source data 1. [file elife-65166-fig4-figsupp3-data1.xlsx]

## Sheet: Figure 4S3 D source data
SAB-3mNeonG				OE-SAB-3mNeonG
mCherry-Tub	LAmRuby	ER-mCherry		mCherry-Tub	LAmRuby	ER-mCherry
0.28592	0.51846	0.63054		0.34652	0.7494	0.87492
0.34422	0.58871	0.59709		0.62035	0.77304	0.81177
0.31334	0.53276	0.75754		0.571	0.67899	0.77949
0.30141	0.42957	0.79799		0.4677	0.66554	0.88072
0.27784	0.54491	0.61068		0.3625	0.58117	0.79239
0.47366	0.50963	0.71226		0.63542	0.6555	0.84854
0.3883	0.50411	0.66087		0.60974	0.61799	0.86309
0.36188		0.66665		0.53011	0.58428	0.8632
		0.78553		0.6669	0.57618	0.88813
		0.77456			0.6681	0.88813
		0.59545			0.49663	0.63517
		0.83368			0.52634
		0.78809
