# Supplementary material for: SABRE populates ER domains essential for cell plate maturation and cell expansion influencing cell and tissue patterning
Source: eLife. 2021 Mar 9;10:e65166. doi: 10.7554/eLife.65166 (PMC7987345; doi:10.7554/eLife.65166)
Supplement: Figure 4—source data 1. [file elife-65166-fig4-data1.xlsx]

## Sheet: Figure 4E source data
SAB-3mNG							OE-SAB-3mNG
ER-mCherry	ER-mCherry flip	LA-mRuby	LA-mRuby flip	mCherry-Tub	mCherry-Tub flip		ER-mCherry	ER-mCherry flip	LA-mRuby	LA-mRuby flip	mCherry-Tub	mCherry-Tub flip
0.49805	0.1631	0.09543	0.09127	0.00359	0.06288		0.69054	0.22626	0.28759	0.30202	0.31699	0.5808
0.71008	0.42915	0.49588	0.36614	0.1101	0.17796		0.61871	0.3983	0.37483	0.38435	0.21441	0.30191
0.60743	0.37479	0.19418	0.0943	0.01726	0.08981		0.61953	0.27522	0.26027	0.44232	0.15622	0.05141
0.64339	0.53745	0.18611	0.18273	0.13267	0.14368		0.68523	0.09949	0.2149	0.23874	0.21724	0.1605
0.40569	0.19401	0.25733	0.15101	0.03459	0.13207		0.56221	0.19668	0.16753	0.01298	0.07673	0.07036
0.43714	0.27128	0.23812	0.21668	0.1217	0.13327		0.67698	0.43826	0.43244	0.41324	0.28392	0.23874
0.47442	0.17798	0.14892	0.35446	0.22112	0.03903		0.64859	0.37958	0.3231	0.14008	0.22782	0.30125
0.63749	0.16354			0.14354	0.39417		0.64525	0.23623	0.22352	0.17653	0.39254	0.47503
0.57818	0.34928						0.67882	0.33237	0.14159	0.03888	0.21048	0.08338
0.682	0.28944						0.61287	0.28981	0.44292	0.27652
0.50364	0.19592						0.71874	0.35362	0.40593	0.15303
0.52928	0.16657								0.26892	0.24359
0.73712	0.3937
