# Supplementary material for: SABRE populates ER domains essential for cell plate maturation and cell expansion influencing cell and tissue patterning
Source: eLife. 2021 Mar 9;10:e65166. doi: 10.7554/eLife.65166 (PMC7987345; doi:10.7554/eLife.65166)
Supplement: Figure 6—source data 1. [file elife-65166-fig6-data1.xlsx]

## Sheet: Figure 6 D E F source data
Basal position/Cell length			Displacement/Total distance			Average instantaneous velocity (µm/hr)
control	sabre		control	sabre		control	sabre
0.2069	0.034056		0.86021	0.87138		12.486	10.81
0.25292	0.11111		0.80099	0.84244		13.411	11.133
0.37322	0.024036		0.94071	0.92953		13.655	14.506
0.23913	0.10675		0.78101	0.47491		12.499	9.796
0.23164	0.10431		0.86771	0.35832		11.91	8.0001
0.37173	0.034091		0.8919	0.45795		13.78	6.2104
0.29724	0.15886		0.9357	0.55003		17.119	7.8758
0.35733	0.079924		0.98391	0.51501		20.585	7.4201
0.21615	0.16609		0.84893	0.72962		11.225	22.136
0.15362	0.12169		0.95053	0.62559		15.231	11.926
0.28205	0.14706		0.775	0.93492		9.8871	13.864
0.32766	0.02807		0.88769	0.48365		13.357	7.8914
0.27916	0.089483		0.52979	0.50625		20.234	8.2674
0.3246	0.051948		0.80055	0.76465		17.705	11.138
0.26645	0.034261		0.94022	0.84836		14.112	14.323
0.25	0.074848		0.44358	0.69846		9.1572	9.3258
0.27586	0.082707		0.83435	0.73918		10.997	9.675
0.34962	0.1121		0.68843	0.47402		4.9001	9.792
0.31641	0.0681		0.802	0.46642		14.196	8.9084
0.13055	0.17014		0.48522	0.59986		7.6744	11.68
0.3903	0.10028		0.66153	0.25862		11.587	8.4291
0.33448	0.17349		0.85622	0.25861		9.3573	8.5599
0.26437	0.034836		0.54525	0.35211		6.3981	7.7511
0.29356	0.031098		0.97423	0.16797		14.075	5.7662
0.29866	0.03527		0.79421	0.53008		7.3705	6.8573
			0.96373	0.15568		16.483	3.3418
			0.96603	0.48645		20.687	5.7171
			0.86772	0.23359		16.755	4.697
			0.60917	0.86759		10.9	9.7088
			0.99447	0.50347		14.235	5.9876
			0.98405	0.6461		15.856	9.7454
			0.91851	0.091999		11.985	3.2084
			0.99164	0.69078		22.662	8.3188
			0.87558	0.3808		13.064	9.4802
			0.83431	0.39539		16.737	7.9842
			0.84006	0.49603		12.321	6.6163
			0.58006	0.64171		6.7682	9.2853
			0.94583	0.36323		12.426	6.2903
			0.97144	0.21456		18.688	6.1494
			0.9717	0.35119		13.523	6.3636
			0.97969	0.55777		19.694	9.4146
			0.31015			4.2718
			0.39908			4.3489
			0.68871			6.6109
			0.44047			9.022
			0.51409			4.9743
