# Supplementary material for: SABRE populates ER domains essential for cell plate maturation and cell expansion influencing cell and tissue patterning
Source: eLife. 2021 Mar 9;10:e65166. doi: 10.7554/eLife.65166 (PMC7987345; doi:10.7554/eLife.65166)
Supplement: Figure 8—source data 1. [file elife-65166-fig8-data1.xlsx]

## Sheet: Figure 8 B D source data
FM4-64						aniline blue
wild type	wild type	∆sabre	∆sabre			wild type	wild type	∆sabre	∆sabre
average	standard error	average	standard error	time(minutes)		average	standard error	average	standard error	time(minutes)
1	0	1	0	0		1	0	1	0	0
0.95331	0.010386	0.97528	0.0037983	1		1.0631	0.01975	1.0018	0.0037025	1
0.92204	0.029875	0.95463	0.0095631	2		1.141	0.041623	1.0126	0.0061636	2
0.86247	0.04018	0.92796	0.019301	3		1.2383	0.068431	1.0189	0.0072569	3
0.79339	0.052669	0.88876	0.030965	4		1.353	0.073789	1.0284	0.0071828	4
0.73649	0.056783	0.8379	0.037028	5		1.4765	0.10058	1.0257	0.0098705	5
0.66812	0.060014	0.798	0.043613	6		1.6507	0.13943	1.0425	0.016382	6
0.61947	0.059917	0.74366	0.046264	7		1.8521	0.17119	1.0491	0.020832	7
0.5692	0.058331	0.69671	0.054753	8		2.0399	0.20963	1.0614	0.020086	8
0.52842	0.050543	0.64477	0.06032	9		2.2513	0.24386	1.0739	0.028818	9
0.49728	0.042829	0.58903	0.061798	10		2.5067	0.29261	1.1103	0.029175	10
0.47163	0.038309	0.53865	0.063106	11		2.8183	0.33558	1.119	0.031423	11
0.45142	0.040281	0.49298	0.062101	12		3.051	0.3436	1.1599	0.042291	12
0.43605	0.04662	0.45051	0.058892	13		3.3701	0.38905	1.1751	0.055473	13
0.42301	0.043142	0.41292	0.056807	14		3.6077	0.41085	1.2266	0.062525	14
0.4199	0.047063	0.38888	0.056204	15		3.8704	0.42903	1.2643	0.073566	15
0.40474	0.048132	0.36195	0.052186	16		4.1046	0.47944	1.2891	0.086309	16
0.39787	0.0503	0.33331	0.048757	17		4.3802	0.50066	1.3798	0.10352	17
0.38582	0.051462	0.31089	0.045804	18		4.6918	0.52652	1.3702	0.11578	18
		0.29483	0.043939	19				1.4421	0.12228	19
		0.28704	0.044441	20				1.5042	0.14391	20
		0.27002	0.040051	21				1.5469	0.14622	21
		0.26033	0.040739	22				1.6239	0.1833	22
		0.24824	0.039533	23				1.686	0.19385	23
		0.23634	0.037501	24				1.7391	0.20997	24
		0.22675	0.039549	25				1.8454	0.24315	25
		0.22099	0.039438	26				1.9112	0.25596	26
		0.21627	0.038511	27				1.9945	0.28795	27
		0.20479	0.038449	28				2.0551	0.31385	28
		0.20222	0.039059	29				2.1582	0.34863	29
		0.19641	0.038134	30				2.261	0.38259	30
		0.18789	0.037584	31				2.3383	0.41176	31
		0.1873	0.039408	32				2.4302	0.42569	32
		0.18226	0.039022	33				2.5182	0.43833	33
		0.17874	0.038056	34				2.6228	0.46916	34
		0.1749	0.038113	35				2.7138	0.52119	35
		0.1715	0.039158	36				2.8344	0.5225	36
		0.16578	0.038826	37				2.9498	0.57322	37
		0.16598	0.038902	38				3.0592	0.59911	38
		0.16235	0.038479	39				3.1128	0.60942	39
		0.1594	0.038696	40				3.2333	0.62165	40
		0.15491	0.038041	41				3.285	0.62477	41
		0.15543	0.041994	42				3.3857	0.65982	42
		0.15445	0.042044	43				3.4748	0.67134	43
		0.15065	0.041075	44				3.5544	0.70045	44
		0.14861	0.042994	45				3.638	0.71645	45
		0.14826	0.042735	46				3.7724	0.7416	46
		0.15164	0.046386	47				3.882	0.78262	47
		0.14931	0.045588	48				3.9236	0.80422	48
		0.14547	0.044576	49				4.0337	0.81434	49
		0.14511	0.044648	50				4.1276	0.87326	50
		0.14492	0.045388	51				4.2414	0.89862	51
		0.14348	0.044648	52				4.2867	0.92623	52
		0.14212	0.04425	53				4.3775	0.94207	53
		0.14163	0.045205	54				4.4809	1.0015	54
		0.13936	0.046559	55				4.581	1.0265	55
		0.13937	0.047862	56				4.6663	1.0724	56
		0.13535	0.045779	57				4.7142	1.0764	57
